# Supplementary material
Source: PubMed Central journal article supplement (PMC8724772)

## Expanded View Figures

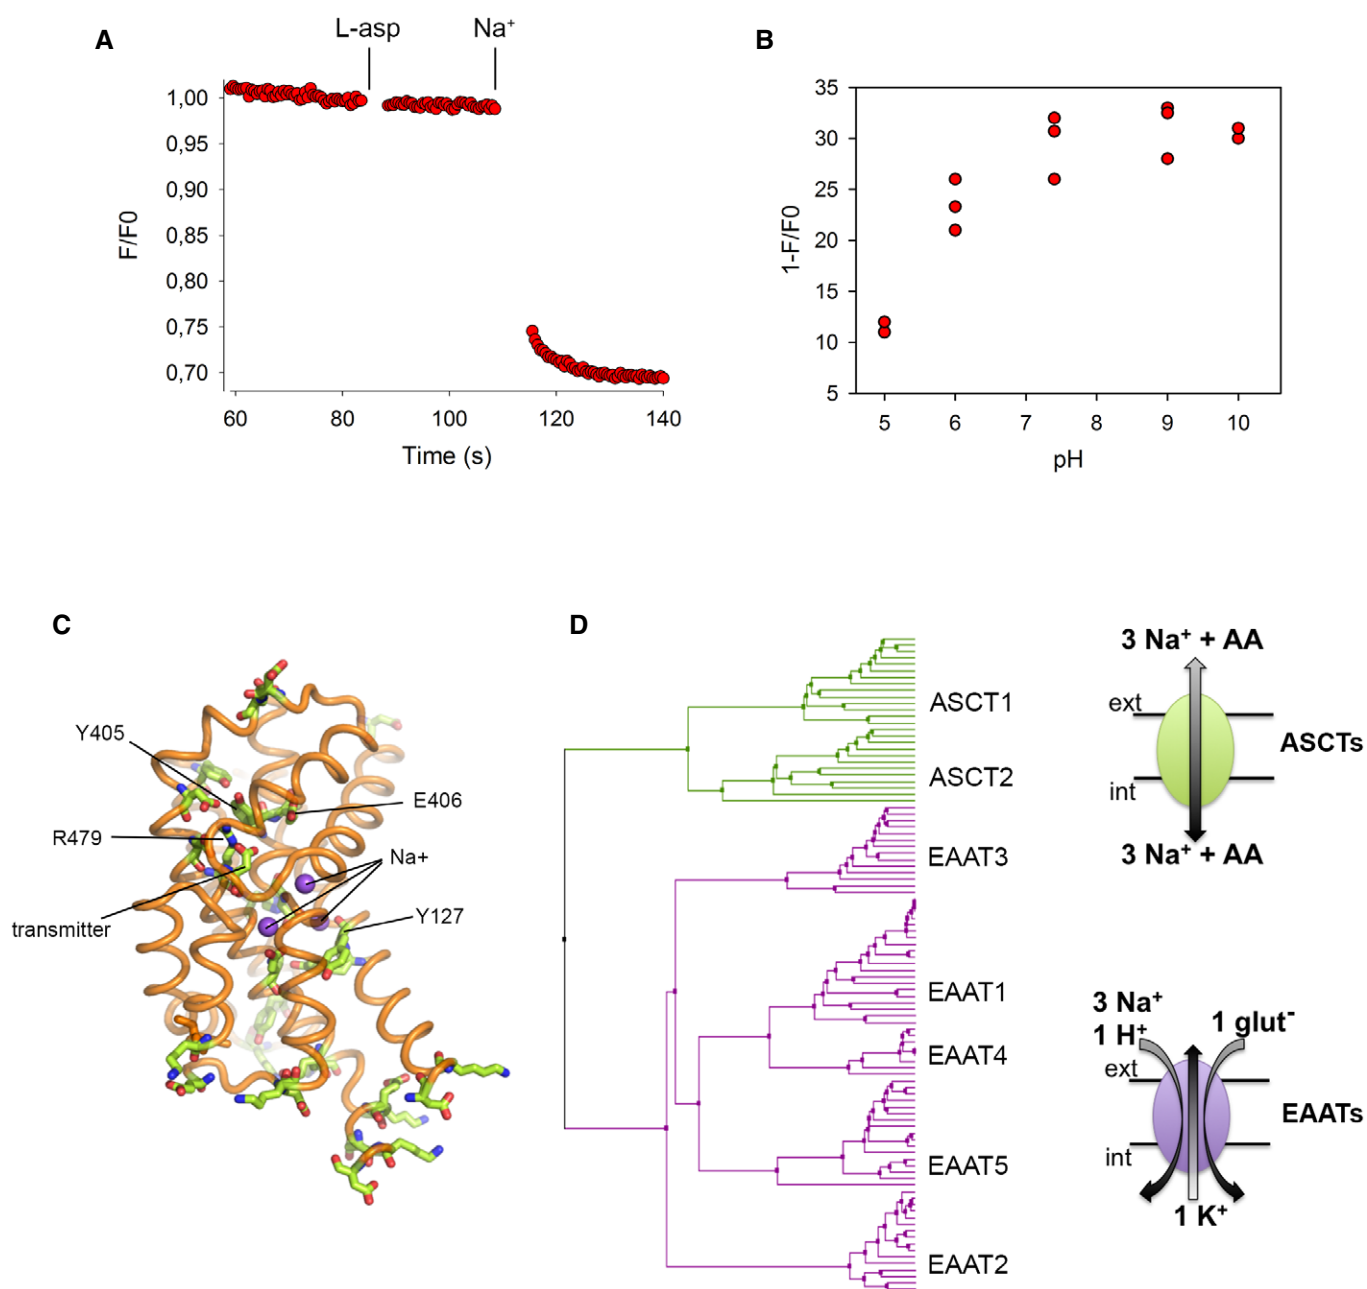

**Figure EV1. Proton binding to conserved ionizable sidechain in EAAT1<sub>CRYST</sub>.**

A EAAT1<sub>CRYST</sub> tryptophan-fluorescence time course at pH 10 upon addition of saturating concentrations of L-aspartate and  $\text{Na}^+$ .

B Percentage of L-aspartate/ $\text{Na}^+$ -induced total fluorescence change ( $1-F/F_0$ ) decreases at pH values below neutral.

C Out of > 30 ionizable sidechains (green sticks) in the tranD of EAAT1<sub>CRYST</sub> only four (labelled with residue number) are strictly conserved in EAATs, and not in ASCTs.

D Phylogenetic tree from 101 tranD sequences of representative vertebrate species (Gesemann *et al.*, 2010) calculated with Jalview (BLOSUM62 average distance).

Transport stoichiometry of EAATs and ASCTs vertebrate proteins is depicted in cartoon representation.

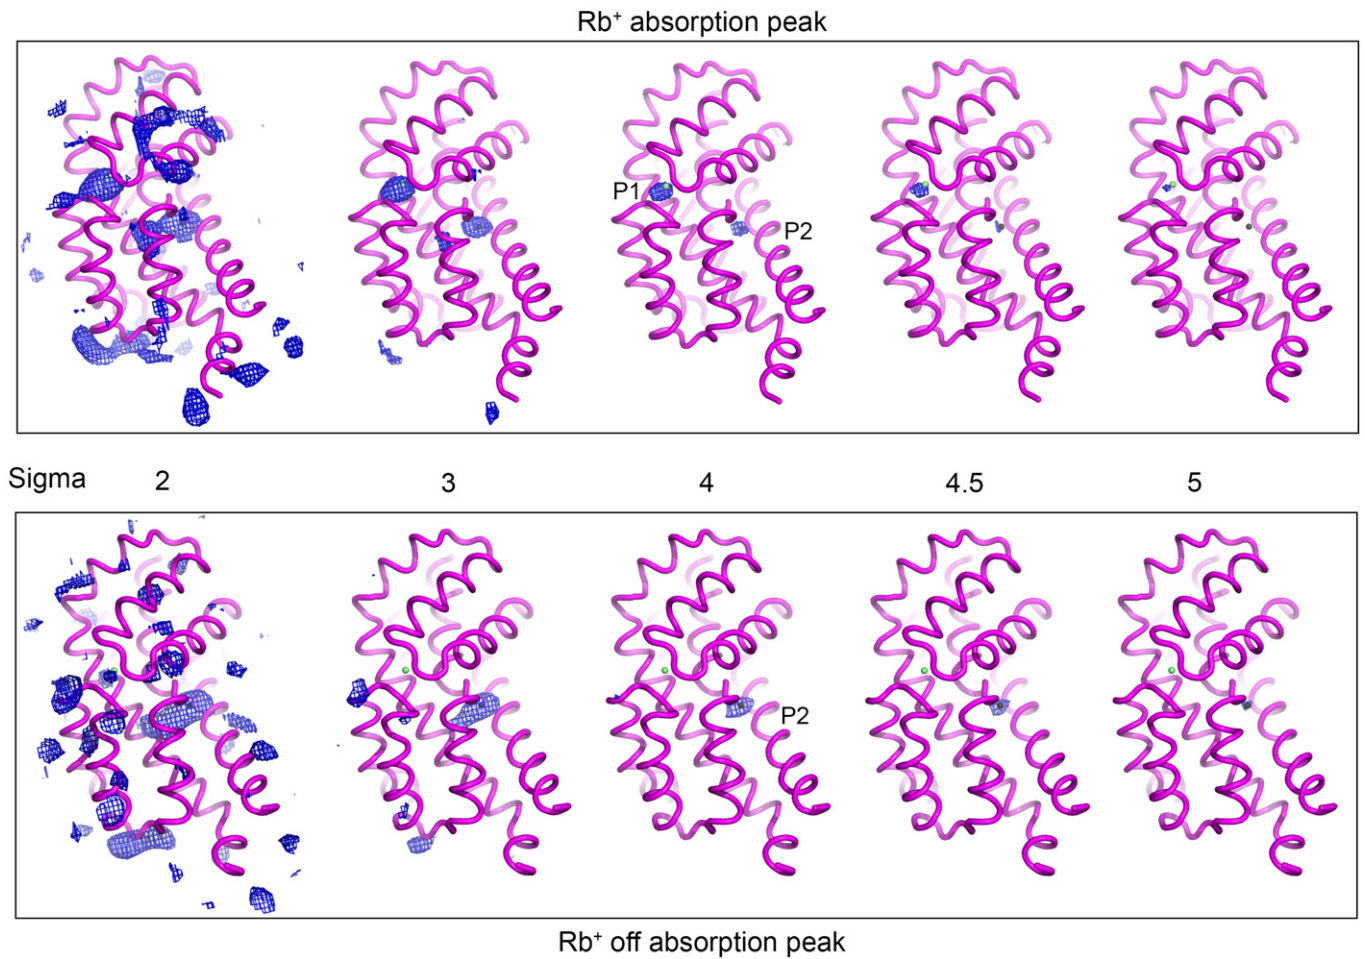

**Figure EV2. Anomalous difference maps of Rb<sup>+</sup>/Ba<sup>2+</sup> bound structure.**

Comparison of anomalous difference maps of Rb<sup>+</sup>/Ba<sup>2+</sup> bound EAAT<sub>CRYST</sub> structure at the Rb<sup>+</sup> absorption maximum (0.815 Å) and that of EAAT<sub>CRYST-II</sub> off the Rb<sup>+</sup> absorption maximum (0.998 Å). Maps are contoured at increasing sigma levels around the tranD. Rb<sup>+</sup> (green sphere) and Ba<sup>2+</sup> (black sphere) bound to the transporters are depicted.

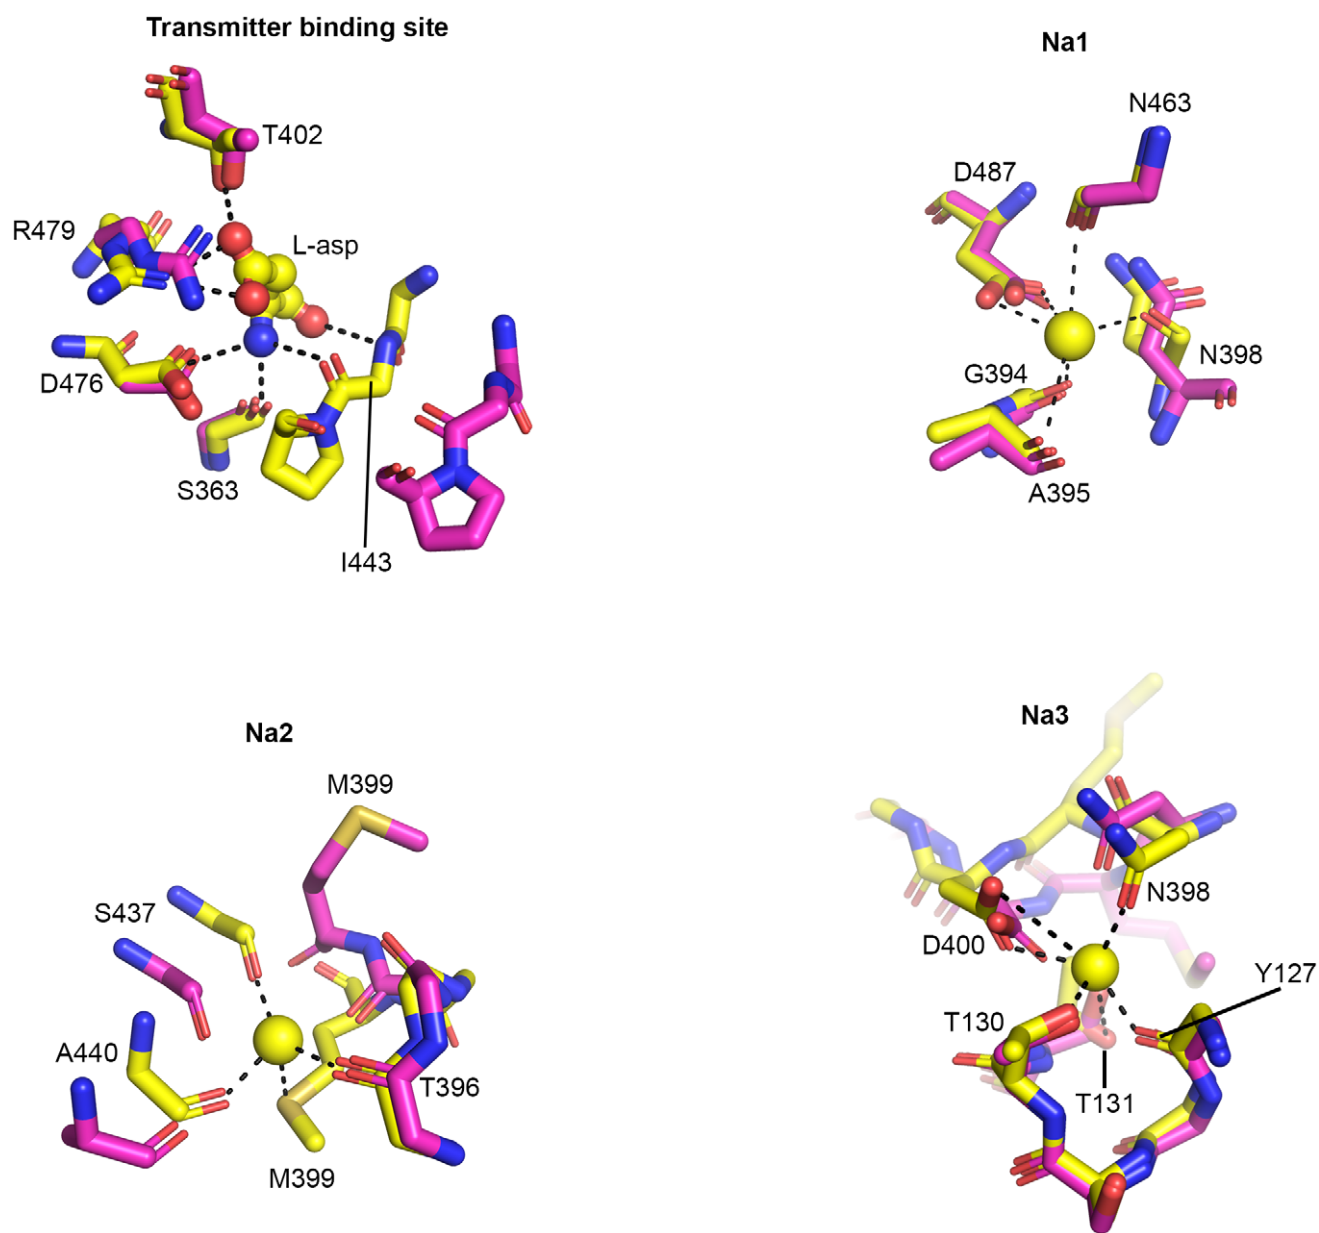

**Figure EV3. Transmitter and sodium binding sites in  $\text{Na}^+$ /transmitter- and  $\text{Rb}^+$  bound structures.**

Conformational re-arrangements around the transmitter and three  $\text{Na}^+$  binding sites in  $\text{Na}^+$ /transmitter- (yellow) and  $\text{Rb}^+$  bound (pink) EAAT<sub>CRYST</sub> structures.

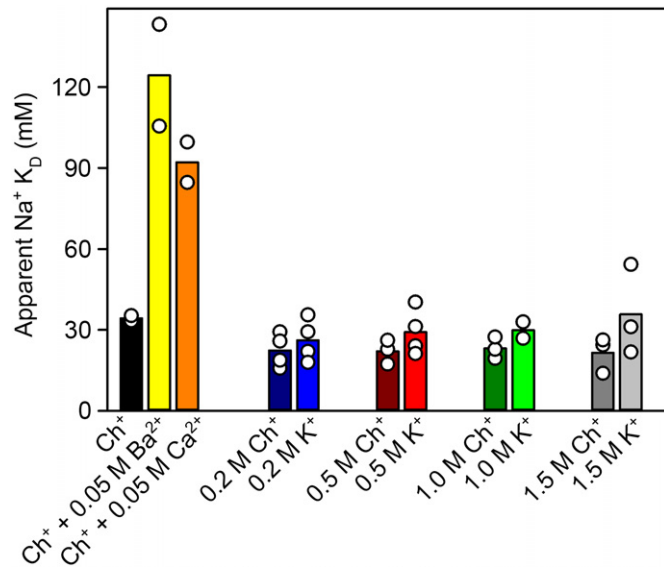

**Figure EV4. Na<sup>+</sup> titrations in different ionic conditions.**

EAAT1<sub>CRYST</sub> apparent Na<sup>+</sup> K<sub>D</sub> significantly increased upon addition of 50 mM Ba<sup>2+</sup> or Ca<sup>2+</sup> to a choline (Ch<sup>+</sup>)-based cuvette buffer, but were not modified when Ch<sup>+</sup> in the buffer was substituted for K<sup>+</sup> at concentrations up to 1.5 M. Bar plots present average of at least two independent experiments (empty circles).

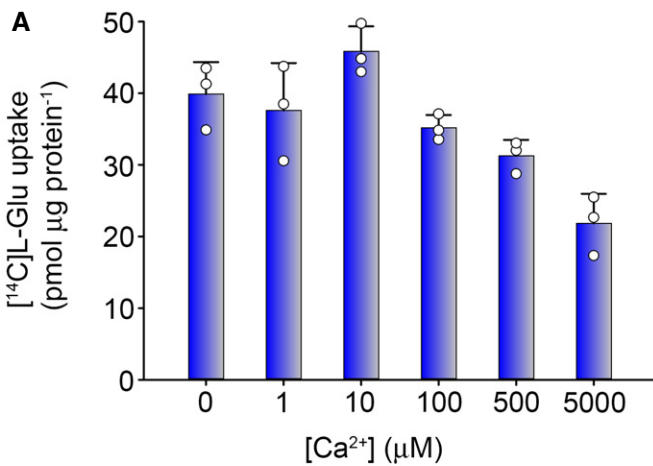

**Figure EV5. Ca<sup>2+</sup> effect on steady-state transmitter transport.**

A Effect of intra-liposomal Ca<sup>2+</sup> on L-glutamate transport in the presence of opposite gradients of Na<sup>+</sup> and K<sup>+</sup>.  
 B Effect of 5 mM extracellular Ca<sup>2+</sup> on L-glutamate transport in cells expressing EAAT1<sub>CRYST</sub>. There was not significant change in Na<sup>+</sup>-induced L-glutamate uptake upon substitution of extracellular Ca<sup>2+</sup> for Mg<sup>2+</sup>, a divalent cation that does not induce changes in Trp fluorescence or compete for Na<sup>+</sup> (not shown).

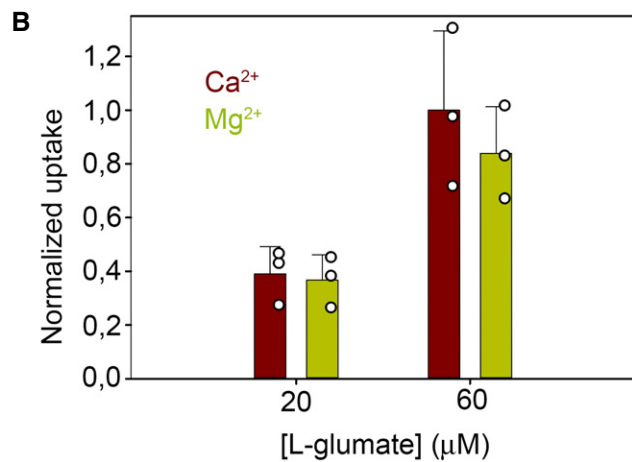

Supplement: EMBJ-41-e108341-s002.pdf [file EMBJ-41-e108341-s002.pdf]
