# Supplementary material
Source: PubMed Central journal article supplement (PMC8724772)
Supplement: EMBJ-41-e108341-s001.pdf [file EMBJ-41-e108341-s001.pdf]

## Appendix

### The ion-coupling mechanism of human excitatory amino acid transporters

Juan C. Canul-Tec<sup>1,2,3</sup>, Anand Kumar<sup>1,2,3</sup>, Jonathan Dhenin<sup>4</sup>, Reda Assal<sup>1</sup>, Pierre Legrand<sup>5</sup>,  
Martial Rey<sup>4</sup>, Julia Chamot-Rooke<sup>4</sup> & Nicolas Reyes<sup>1,2,3\*</sup>

<sup>1</sup>*Membrane Protein Mechanisms Unit, Institut Pasteur, 25–28 rue du Docteur Roux, 75015 Paris, France*

<sup>2</sup>*Membrane Protein Mechanisms Group, European Institute of Chemistry and Biology, University of Bordeaux, 2 rue Robert Escarpit 33607 Pessac, France*

<sup>3</sup>*CNRS UMR 5234 Fundamental microbiology and pathogenicity, Bordeaux, France*

<sup>4</sup>*Mass Spectrometry for Biology Unit, CNRS USR 2000, Institut Pasteur, Paris 75015, France*

<sup>5</sup>*Synchrotron SOLEIL, L'Orme des Merisiers, 91192 Gif-sur-Yvette, France*

*\*corresponding author*

Content:

Appendix Figures S1-S6

Appendix Tables S1-S3

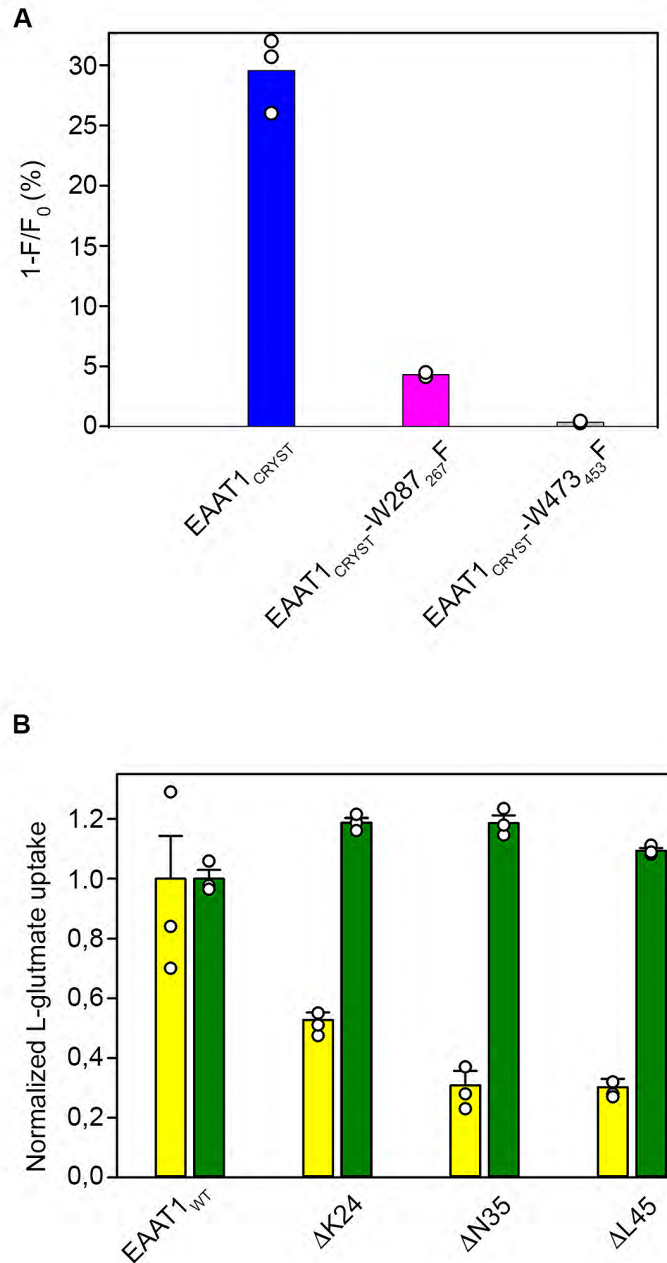

**Appendix Figure S1 Effect Trp to Phe mutations on intrinsic-Trp fluorescence, and TM1a' deletions on transmitter transport.**

A. Percentage of L-asp/Na<sup>+</sup> induced total fluorescence change (1-F/F<sub>0</sub>). Individual phenylalanine mutations of W287<sub>267</sub> and W473<sub>453</sub> greatly decreased and abolished, respectively, Trp-intrinsic fluorescence associated to L-asp/Na<sup>+</sup> binding. Bar plots depict averages of at least two independent experiments (empty circles) performed in duplicates.

B. Radioactive L-glutamate uptake by HEK293 cells expressing EAAT1<sub>WT</sub>-GFP fusion, and N-term truncations of this construct (labeled with the N-term residue). L-glutamate uptake decreases steeply in incremental N-term truncated constructs (radioactive counts, yellow bars), while protein expression (GFP counts, green bars) remain relatively constant compared to EAAT<sub>WT</sub>. Bar plots depict averages and s.e.m. of three independent experiments (empty circles) performed in duplicates.

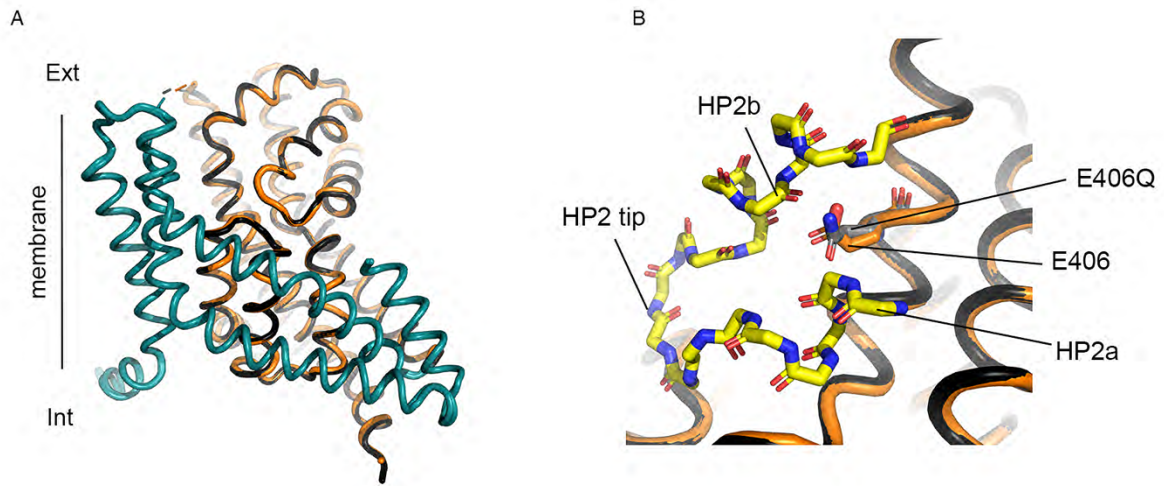

**Appendix Figure S2 Transmitter-bound EAAT1<sub>CRYST</sub>-E406<sub>386</sub>Q structure**

A. Superimposition of Na<sup>+</sup>/transmitter-bound EAAT1<sub>CRYST</sub> (tranD orange) and EAAT1<sub>CRYST</sub>-E406<sub>386</sub>Q (tranD black) structures.

B. 406<sub>386</sub> sidechains adopt similar positions in the two structures, consistent with H-bonding between protonated E406<sub>386</sub> and residues in HP2b (yellow).

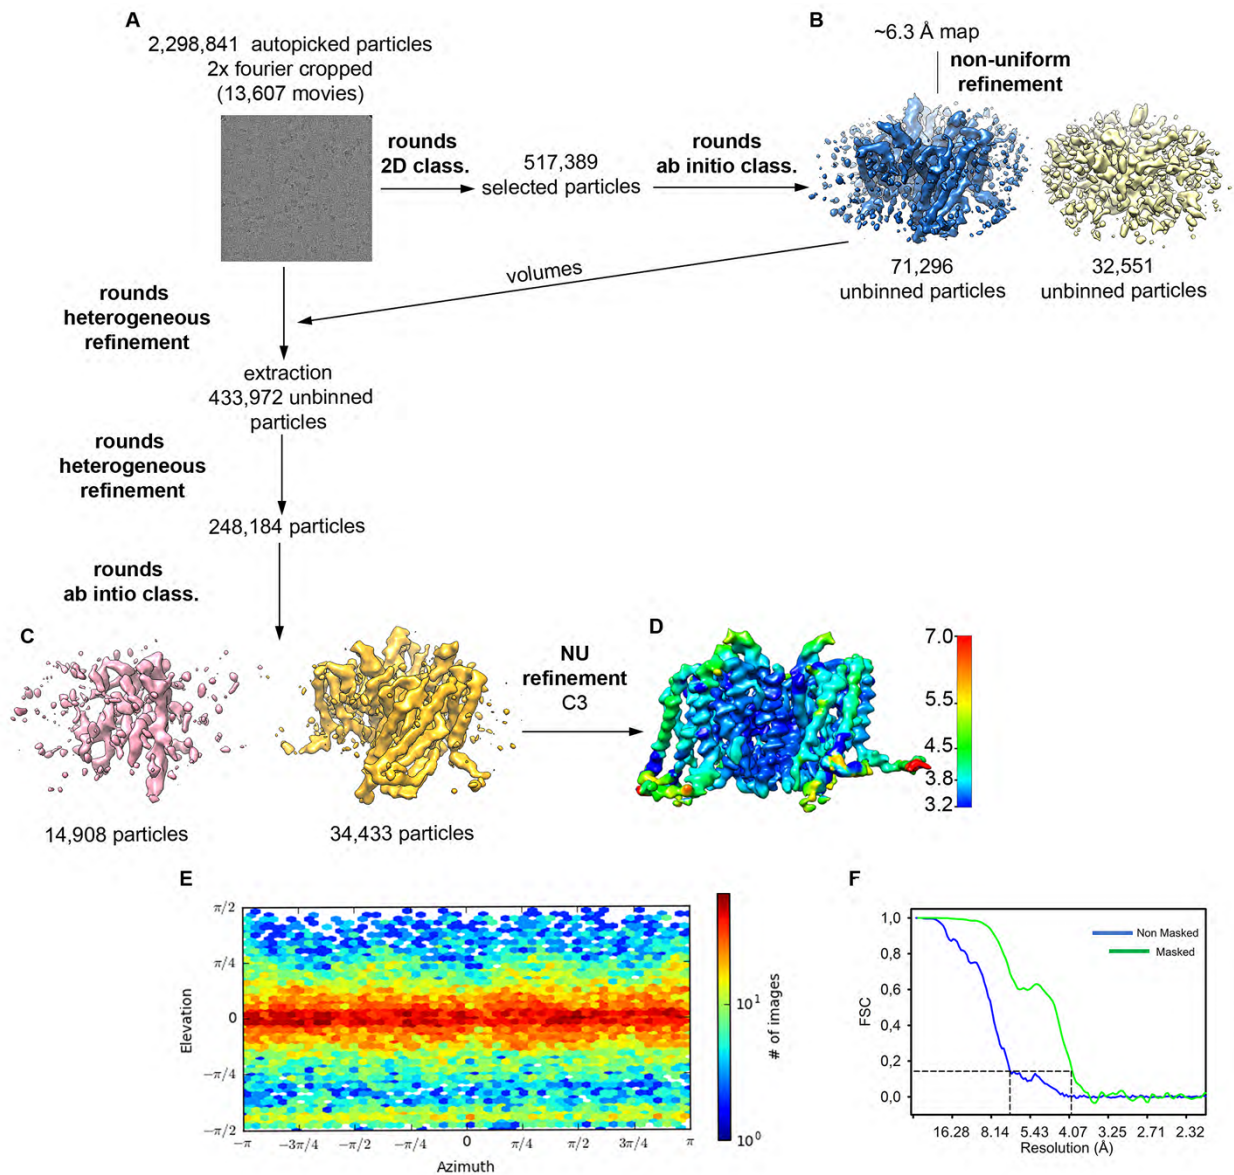

**Appendix Figure S3 Overview cryo-EM data processing pipeline using cryoSPARC for EAAT1<sub>WT</sub> structure determination.**

A. Representative EM micrograph.

B. First 3D *ab initio* classes used for heterogenous refinements.

C. Final 3D *ab initio* classes.

D. Refined and B-factor sharpened EM map colored by local resolution estimation.

E. Viewing direction distribution plot corresponding to C3-symmetric map shown in (D) after non-uniform refinement.

F. Fourier shell correlation (FSC) plot calculated in cryoSPARC with intercepts (dashed lines) at FSC 0.143.

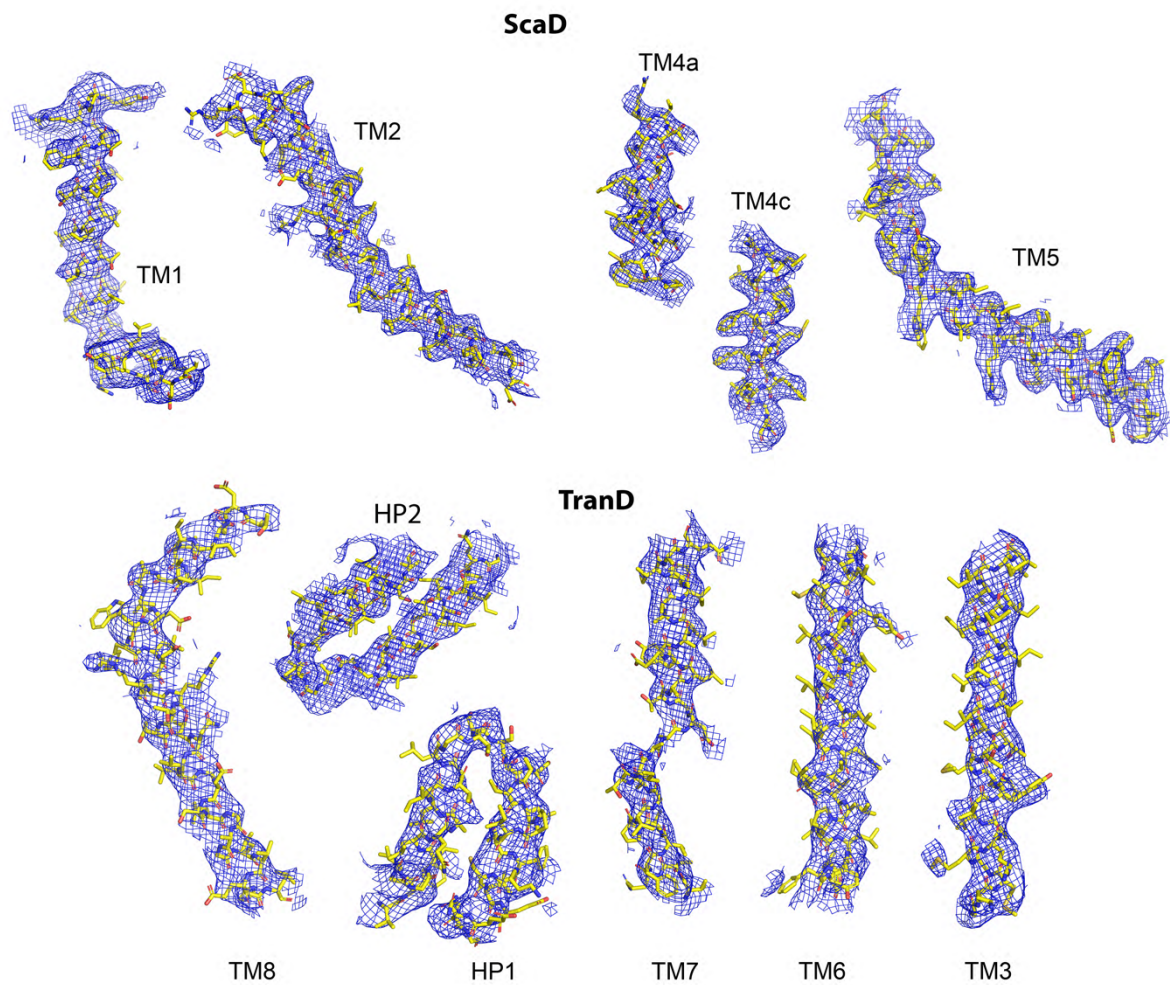

**Appendix Figure S4 CryoEM density in EAAT1<sub>WT</sub> structure**  
CryoEM density around transmembrane helices in scaD and tranD, respectively.

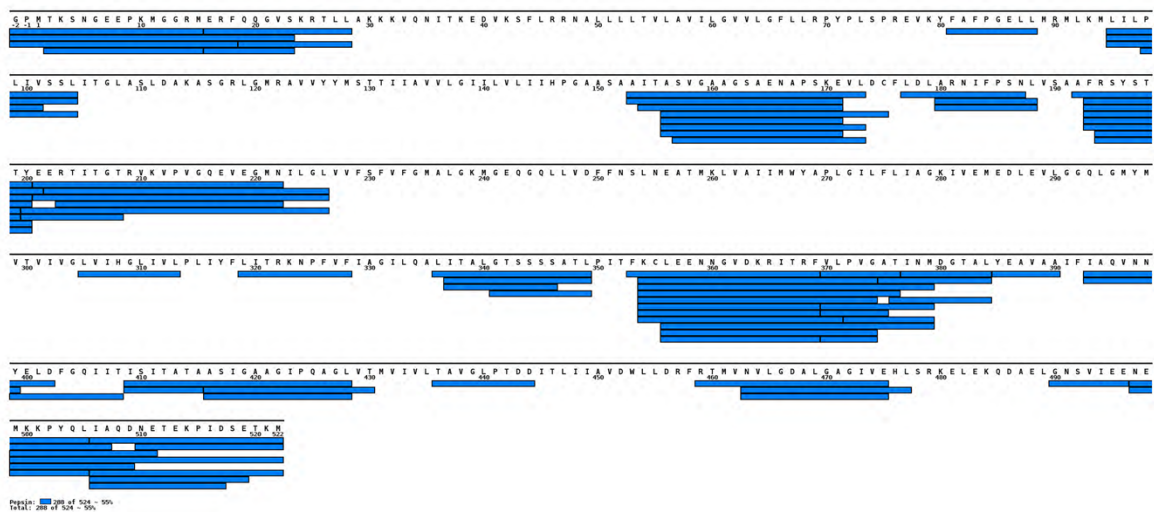

### Appendix Figure S5 EAAT1<sub>CRYST</sub> HDX-peptide coverage map

77 peptides covering 55% of the EAAT1<sub>CRYST</sub> sequence were selected for HDX-MS analysis. Each bar below the protein sequence corresponds to a unique peptide. Amino acid numbering of the transporter starts at methionine. Two N-terminal residues (GP) remain after protease treatment during protein purification, and residue numbers correspond to EAAT1<sub>CRYST</sub> sequence. The map was generated with MSTools (<https://www.hxms.com/mstools>).

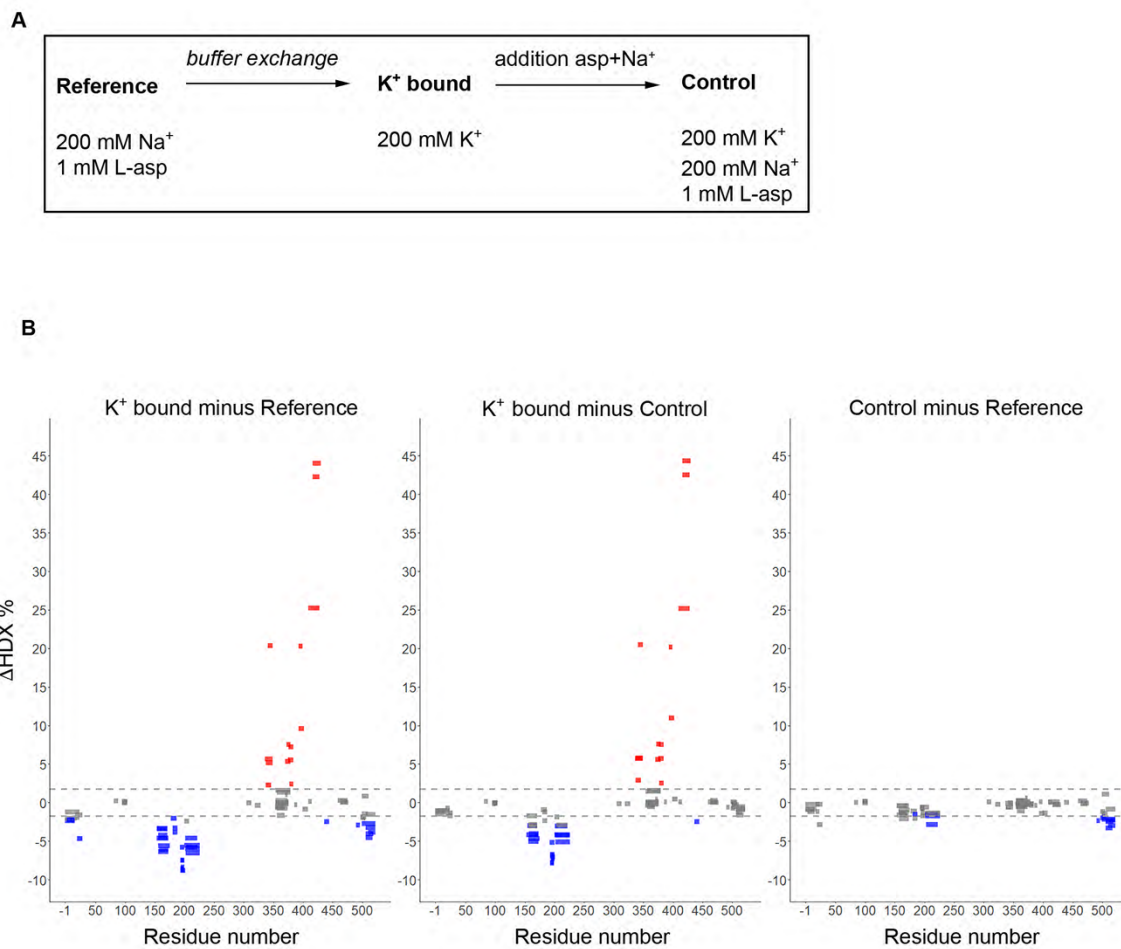

### Appendix Figure S6 Reversible K<sup>+</sup>-induced HDX changes

A. Schematic of HDX experimental setup indicating cation and ligand concentrations (see also methods).

B. Woods plots depicting percentage deuterium changes ( $\Delta\text{HDX \%}$ ) of monitored peptides across EAAT1<sub>CRYST</sub> sequence.  $\Delta\text{HDX \%}$  values were generated by subtraction of deuterium uptake values between pairs of transporter states as indicated in each plot. Peptides exhibiting significant increase and decrease deuterium uptake are coloured red and blue, respectively, and those showing no significant changes in grey.

|                                            | EAAT1 <sub>CRYST</sub> Na <sup>+</sup> /L-asp<br>and UCPH <sub>101</sub> bound | EAAT1 <sub>CRYST</sub> -E386Q<br>Na <sup>+</sup> /L-asp and<br>UCPH <sub>101</sub> bound | EAAT1 <sub>CRYST</sub> Rb <sup>+</sup> /Ba <sup>+2</sup> and<br>UCPH <sub>101</sub> bound |
|--------------------------------------------|--------------------------------------------------------------------------------|------------------------------------------------------------------------------------------|-------------------------------------------------------------------------------------------|
| <b>Data collection</b>                     |                                                                                |                                                                                          |                                                                                           |
| Space group                                | <i>P6<sub>3</sub></i>                                                          | <i>P6<sub>3</sub></i>                                                                    | <i>P6<sub>3</sub></i>                                                                     |
| Cell dimensions                            |                                                                                |                                                                                          |                                                                                           |
| $a=b, c$ (Å)                               | 122.88, 90.03                                                                  | 123.99, 90.80                                                                            | 124.24, 91.22                                                                             |
| $\alpha=\beta, \gamma$ (°)                 | 90.0, 120.0                                                                    | 90.0, 120.0                                                                              | 90.0, 120.0                                                                               |
| Wavelength (Å)                             | 0.979                                                                          | 0.979                                                                                    | 0.815                                                                                     |
| Resolution (Å)                             | 45.81- <b>3.25</b><br>(3.33-3.25)                                              | 46.21- <b>3.60</b><br>(3.69-3.60)                                                        | 46.34- <b>3.92</b><br>(4.03-3.92)                                                         |
| Measured reflections                       | 166319 (11129)                                                                 | 199896 (9786)                                                                            | 148439 (10475)                                                                            |
| Unique reflections                         | 12293 (887)                                                                    | 9313 (681)                                                                               | 7264 (519)                                                                                |
| Completeness (%)                           | 99.8 (98.1)                                                                    | 99.9 (99.9)                                                                              | 99.8 (98.5)                                                                               |
| Completeness <sup>STARANISO</sup> (%)      | 79.3 (28.6)                                                                    | 83.2 (37.2)                                                                              | 81.5 (39.5)                                                                               |
| $I/\sigma(I)$                              | 8.8 (0.4)                                                                      | 8.3 (0.5)                                                                                | 11.3 (0.6)                                                                                |
| $I/\sigma(I)$ <sup>STARANISO</sup>         | 12.1 (1.3)                                                                     | 11.1 (1.2)                                                                               | 13.8 (1.4)                                                                                |
| CC <sub>1/2</sub>                          | 0.99 (0.17)                                                                    | 0.99 (0.3)                                                                               | 1.00 (0.55)                                                                               |
| CC <sub>1/2</sub> <sup>STARANISO</sup>     | 0.99 (0.52)                                                                    | 0.99 (0.62)                                                                              | 0.99 (0.62)                                                                               |
| Redundancy                                 | 13.5 (12.5)                                                                    | 21.5 (14.4)                                                                              | 20.4 (20.1)                                                                               |
| Redundancy <sup>STARANISO</sup>            | 13.7 (14.3)                                                                    | 21.9 (14.5)                                                                              | 20.5 (20.0)                                                                               |
| $R_{\text{merge}}$ <sup>STARANISO</sup>    | 0.13 (2.3)                                                                     | 0.14 (2.0)                                                                               | 0.10 (2.4)                                                                                |
| Anisotropy direction <sup>§</sup>          |                                                                                |                                                                                          |                                                                                           |
| Resolution                                 |                                                                                |                                                                                          |                                                                                           |
| Overall (Å)                                | 3.25                                                                           | 3.60                                                                                     | 3.92                                                                                      |
| along h, k axis (Å)                        | 3.67                                                                           | 3.60                                                                                     | 4.01                                                                                      |
| along l axis (Å)                           | <b>3.25</b>                                                                    | <b>3.60</b>                                                                              | <b>3.92</b>                                                                               |
| <b>Refinement</b>                          |                                                                                |                                                                                          |                                                                                           |
| Resolution cut-off (Å)                     | 23.31- <b>3.25</b>                                                             | 28.0- <b>3.60</b>                                                                        | 21.85- <b>3.92</b>                                                                        |
| No. of work/test<br>reflections            | 9675/440                                                                       | 7703/394                                                                                 | 5860/294                                                                                  |
| $R_{\text{cryst}}/R_{\text{free}}$ (%)     | 21.9/23.8                                                                      | 22.4/26.8                                                                                | 23.0/27.8                                                                                 |
| No. of protein atoms                       | 3135                                                                           | 3100                                                                                     | 2973                                                                                      |
| No. of heteroatoms                         | 45                                                                             | 44                                                                                       | 35                                                                                        |
| Average <i>B</i> factors (Å <sup>2</sup> ) |                                                                                |                                                                                          |                                                                                           |
| Protein                                    | 135.7                                                                          | 109.0                                                                                    | 148.3                                                                                     |
| Heteroatoms                                | 114.2                                                                          | 85.5                                                                                     | 142.1                                                                                     |
| R.m.s. deviations                          |                                                                                |                                                                                          |                                                                                           |
| Bond lengths (Å)                           | 0.01                                                                           | 0.009                                                                                    | 0.009                                                                                     |
| Bond angles (°)                            | 1.17                                                                           | 1.05                                                                                     | 1.03                                                                                      |

**Appendix Table S1 X-ray data collection and refinement statistics.** 5% of reflections were used for calculation of  $R_{\text{free}}$ . Values in parentheses are for the highest-resolution shell. Data collection statistics were extracted with AIMLESS before and after anisotropic correction with STARANISO.



|                                                          | EAAT1 <sub>CRYST-II</sub> Rb <sup>+</sup> /Ba <sup>+2</sup><br>and UCPH <sub>101</sub> bound | EAAT1 <sub>CRYST-II</sub><br>Ba <sup>+2</sup> and UCPH <sub>101</sub><br>bound |
|----------------------------------------------------------|----------------------------------------------------------------------------------------------|--------------------------------------------------------------------------------|
| <b>Data collection*</b>                                  |                                                                                              |                                                                                |
| Space group                                              | <i>P6<sub>3</sub></i>                                                                        | <i>P6<sub>3</sub></i>                                                          |
| Cell dimensions                                          |                                                                                              |                                                                                |
| <i>a=b, c</i> (Å)                                        | 124.38, 91.44                                                                                | 124.94, 92.02                                                                  |
| <i>α=β, γ</i> (°)                                        | 90.0, 120.0                                                                                  | 90.0, 120.0                                                                    |
| Wavelength (Å)                                           | 0.979                                                                                        | 0.979                                                                          |
| Resolution (Å)                                           | 46.41- <b>3.91</b><br>(4.01-3.91)                                                            | 46.64- <b>3.70</b><br>(3.80-3.70)                                              |
| Measured reflections                                     | 123824 (8035)                                                                                | 181351 (13388)                                                                 |
| Unique reflections                                       | 7403 (549)                                                                                   | 8827 (657)                                                                     |
| Completeness (%)                                         | 99.8 (99.1)                                                                                  | 99.9 (99.8)                                                                    |
| Completeness <sup>STARANISO</sup> (%)                    | 63.4 (25.4)                                                                                  | 74.7 (30.3)                                                                    |
| <i>I</i> / <i>σ</i> ( <i>I</i> )                         | 9.0 (0.3)                                                                                    | 11.3 (0.5)                                                                     |
| <i>I</i> / <i>σ</i> ( <i>I</i> ) <sup>STARANISO</sup>    | 15.7 (1.6)                                                                                   | 15.5 (1.9)                                                                     |
| CC <sub>1/2</sub>                                        | 1.00 (0.15)                                                                                  | 0.99 (0.43)                                                                    |
| CC <sub>1/2</sub> <sup>STARANISO</sup>                   | 1.00 (0.37)                                                                                  | 0.99 (0.72)                                                                    |
| Redundancy                                               | 16.7 (14.6)                                                                                  | 20.5 (20.3)                                                                    |
| Redundancy <sup>STARANISO</sup>                          | 17.0 (16.2)                                                                                  | 20.6 (20.1)                                                                    |
| <i>R</i> <sub>merge</sub> <sup>STARANISO</sup>           | 0.09 (2.2)                                                                                   | 0.10 (2.3)                                                                     |
| Anisotropy direction <sup>§</sup>                        |                                                                                              |                                                                                |
| Resolution                                               |                                                                                              |                                                                                |
| Overall (Å)                                              | 3.91                                                                                         | 3.70                                                                           |
| along h, k axis (Å)                                      | 4.87                                                                                         | 4.06                                                                           |
| along l axis (Å)                                         | <b>3.91</b>                                                                                  | <b>3.70</b>                                                                    |
| <b>Refinement</b>                                        |                                                                                              |                                                                                |
| Resolution cut-off (Å)                                   | 23.0- <b>3.91</b>                                                                            | 22.00- <b>3.70</b>                                                             |
| No. of work/test reflections                             | 4632/228                                                                                     | 6520/319                                                                       |
| <i>R</i> <sub>cryst</sub> / <i>R</i> <sub>free</sub> (%) | 24.6/29.1                                                                                    | 23.7/28.5                                                                      |
| No. of protein atoms                                     | 2933                                                                                         | 2953                                                                           |
| No. of heteroatoms                                       | 35                                                                                           | 34                                                                             |
| Average <i>B</i> factors (Å <sup>2</sup> )               |                                                                                              |                                                                                |
| Protein                                                  | 149.4                                                                                        | 164.9                                                                          |
| Heteroatoms                                              | 152.9                                                                                        | 158.3                                                                          |
| R.m.s. deviations                                        |                                                                                              |                                                                                |
| Bond lengths (Å)                                         | 0.009                                                                                        | 0.009                                                                          |
| Bond angles (°)                                          | 1.00                                                                                         | 1.04                                                                           |

**Appendix Table S2 X-ray data collection and refinement statistics.** 5% of reflections were used for calculation of *R*<sub>free</sub>. Values in parentheses are for the highest-resolution shell. Data collection statistics were extracted with AIMLESS before and after anisotropic correction with STARANISO.

|                                                 |                              |
|-------------------------------------------------|------------------------------|
|                                                 | EAAT1 <sub>WT</sub>          |
| <b>Data collection</b>                          |                              |
| Sample                                          | EAAT1                        |
| Microscope                                      | FEI Titan Krios              |
| Voltage (kV)                                    | 300                          |
| Detector                                        | Gatan K2-Summit              |
| Energy Filter                                   | EFTEM 165K                   |
| Electron dose (e <sup>-</sup> /Å <sup>2</sup> ) | 42.3                         |
| Defocus range (μm)                              | -2.0 to -0.8                 |
| Micrographs collected                           | 13607                        |
| Software                                        | CryoSPARC v3.1.0             |
| Final Particle set (No.)                        | 34,433                       |
| Resolution (Å)                                  | 3.99                         |
| FSC threshold                                   | 0.143                        |
| Sharpening B-factor                             | -126                         |
| <b>Coordinate refinement and validation</b>     |                              |
| Initial model used (PDB ID)                     | 7AWP, 6GCT                   |
| Software                                        | PHENIX real_space_refinement |
| Model resolution (Å)                            | 4.07                         |
| FSC threshold                                   | 0.143                        |
| Protein residues                                | 1278                         |
| Non hydrogen atoms                              | 9714                         |
| RMSD bonds (Å)                                  | 0.003                        |
| RMSD angles (°)                                 | 0.765                        |
| Ramachandran favored                            | 96.65                        |
| Ramachandran allowed                            | 3.35                         |
| Ramachandran outlier                            | 0.0                          |
| Rotamer outlier                                 | 0.0                          |
| All atom clashscore                             | 13.73                        |
| Mol Probity score                               | 1.86                         |

### Appendix Table S3 Cryo-EM data collection and refinement statistics
