# Supplementary material
Source: PubMed Central journal article supplement (PMC8724772)
Supplement: EMBJ-41-e108341-s003.pdf [file EMBJ-41-e108341-s003.pdf]

# The ion-coupling mechanism of human excitatory amino acid transporters

Juan Canul-Tec, Anand Kumar, Jonathan Dhenin, Reda Assal, Pierre Legrand, Martial Rey, Julia Chamot-Rooke and Nicolas Reyes

DOI: [10.15252/emj.2021108341](https://doi.org/10.15252/emj.2021108341)

Corresponding author(s): Nicolas Reyes ([nicolas.reyes@u-bordeaux.fr](mailto:nicolas.reyes@u-bordeaux.fr))

---

## Review Timeline:

|                     |             |
|---------------------|-------------|
| Submission Date:    | 25th Mar 21 |
| Editorial Decision: | 3rd May 21  |
| Revision Received:  | 11th Aug 21 |
| Editorial Decision: | 29th Sep 21 |
| Revision Received:  | 1st Oct 21  |
| Accepted:           | 4th Oct 21  |

---

Editor: Daniel Klimmeck

## Transaction Report:

(Note: With the exception of the correction of typographical or spelling errors that could be a source of ambiguity, letters and reports are not edited. Depending on transfer agreements, referee reports obtained elsewhere may or may not be included in this compilation. Referee reports are anonymous unless the Referee chooses to sign their reports.)

Dear Dr Reyes,

Thank you for the submission of your manuscript (EMBOJ-2021-108341) to The EMBO Journal. Please accept my apologies for the unusual delay with the peer-review of your work due to protracted referee input and detailed discussions in the team. Your manuscript has been sent to two reviewers and we have received reports from both of them, which I enclose below.

As you will see, the referees acknowledge the potential interest and novelty of your results, although they also express a number of major issues that will have to be conclusively addressed before they can be supportive of publication of your manuscript in The EMBO Journal. In more detail, referee #1 points to concerns on insufficient proof for a functional role of Ca<sup>2+</sup> binding on transport substrate function and the level of insights provided into requirement of extra- versus intracellular Ca<sup>2+</sup> and its entry paths (ref#1, pt.1). Referee #2 agrees in that the proposed competition between Ca<sup>2+</sup> and Na<sup>+</sup> needs is not satisfactorily supported at this stage and needs consolidation via numerous experiments (ref#2, pt.1). Further, this reviewer requests refinement of the K<sup>+</sup> location annotated to the EAAT structure (ref#2, pt.2).

Given the referees' overall positive recommendations, I would like to invite you to submit a revised version of the manuscript, addressing the comments of all three reviewers. I have to emphasize though that given the required additional support for key aspects of the study, we will need a strong revision to move forward towards publication of this article at the EMBO Journal.

We generally allow three months as standard revision time. As a matter of policy, competing manuscripts published during this period will not negatively impact on our assessment of the conceptual advance presented by your study. However, we request that you contact the editor as soon as possible upon publication of any related work, to discuss how to proceed. Should you foresee a problem in meeting this three-month deadline, please let us know in advance and we may be able to grant an extension.

In this context I also want to point to our adjusted GTA. We are aware that many laboratories cannot function at full efficiency during the current COVID-19/SARS-CoV-2 pandemic and have therefore extended our 'scooping protection policy' to cover the period required for a full revision to address the experimental issues highlighted in the editorial decision letter. Please contact us at any time to discuss an adapted revision plan for your manuscript should you need additional time, and also if you see a paper with related content published elsewhere.

Thank you for the opportunity to consider your work for publication. I look forward to your revision.

Kind regards,

Daniel Klimmeck

Daniel Klimmeck, PhD  
Senior Editor  
The EMBO Journal

Instructions for preparing your revised manuscript:

Please make sure you upload a letter of response to the referees' comments together with the revised manuscript.

Please also check that the title and abstract of the manuscript are brief, yet explicit, even to non-specialists.

When assembling figures, please refer to our figure preparation guideline in order to ensure proper formatting and readability in print as well as on screen:

<https://bit.ly/EMBOPressFigurePreparationGuideline>

**IMPORTANT:** When you send the revision we will require

- a point-by-point response to the referees' comments, with a detailed description of the changes made (as a word file).
- a word file of the manuscript text.
- individual production quality figure files (one file per figure)
- a complete author checklist, which you can download from our author guidelines (<https://www.embopress.org/page/journal/14602075/authorguide>).

- Expanded View files (replacing Supplementary Information)

Please see out instructions to authors

<https://www.embopress.org/page/journal/14602075/authorguide#expandedview>

Please remember: Digital image enhancement is acceptable practice, as long as it accurately represents the original data and conforms to community standards. If a figure has been subjected to significant electronic manipulation, this must be noted in the figure legend or in the 'Materials and Methods' section. The editors reserve the right to request original versions of figures and the original images that were used to assemble the figure.

Further information is available in our Guide For Authors: <https://www.embopress.org/page/journal/14602075/authorguide>

The revision must be submitted online within 90 days; please click on the link below to submit the revision online before 1st Aug 2021.

<https://emboj.msubmit.net/cgi-bin/main.plex>

-----  
Referee #1:

The study provides a comprehensive analysis of the ion coupling mechanism of the glutamate transporter, EAAT1. This topic has been studied for many years initially using electrophysiological and site-directed mutagenesis methods, and in more recent years with structural biology and molecular dynamics simulations. During this time a number of conflicting proposals were put forward. This current study has managed to bring all these studies together and provide a detailed analysis of the process that is consistent with many earlier proposals. It is wonderful to see it all come together in a way that ties it all together.

Whilst the majority of the work is clearly presented and very convincing, the one aspect of the work that is superficially addressed is the proposal that Ca<sup>2+</sup> binds to the transporter to presumably modulate the function of the transporter. This is a very novel proposal and needs further clarification. Convincing evidence is provided that Ca<sup>2+</sup> binds to an outward facing conformation of the transporter at the Na<sub>3</sub> site and that Ca<sup>2+</sup> is not transported by EAAT1. But, this implies that Ca<sup>2+</sup> is able to influence the function of the transporter. There are a few points that need clarification:

1. If Ca<sup>2+</sup> binds to the outward facing conformation of the transporter with a K<sub>d</sub> of 2 mM, then you would expect that Ca<sup>2+</sup> would impact on the function of the transporter under physiological conditions. This idea should be explored in greater depth. I would like to see the impact of a Ca<sup>2+</sup> titration on the rate of uptake of substrate. Presumably, this would be via extracellular Ca<sup>2+</sup>, but it would be worthwhile testing the effect of Ca<sup>2+</sup> in both the intracellular and extracellular solutions.
2. Whilst the above experiment may address the issue as to whether the relevant Ca<sup>2+</sup> is intracellular or extracellular, it would be nice to use molecular dynamics simulations to get a better understanding of the entry pathways of Ca<sup>2+</sup> into the Na<sub>3</sub> site.
3. In the discussion of the potential role of Ca<sup>2+</sup>, the authors have speculated as to the impact of variations in intracellular Ca<sup>2+</sup>. If Ca<sup>2+</sup> is binding to the outward facing state, then extracellular Ca<sup>2+</sup> is more physiologically relevant. This needs to be clarified.

This additional work on the role of Ca<sup>2+</sup> suggested may be better suited to a separate study, but I am happy to leave this suggestion to the authors

Referee #2:

Glutamate is the most abundant excitatory neurotransmitter in the CNS and the glutamate transporters (EAATs 1-5) are important in the re-uptake of glutamate from the synaptic cleft. Central to the mechanism of the EAATs is the coupling between Na<sup>+</sup>, H<sup>+</sup> and glutamate as well as K<sup>+</sup>, which catalyses the transition back to the outward-state after releasing sodium and substrate. The manuscript by the Reyes lab builds upon their previous crystal structure of EAAT1 with a combination of spectroscopy, crystal structures in complex with anomalous scatters mimicking Na<sup>+</sup>/K<sup>+</sup> sites as well as a mutant deficient in proton coupling, a cryo EM structure of EAAT1, transport assays and HDX-MS measurements. By combining these methods they have been able to validate the location of the three Na<sup>+</sup> sites, the elevator-structural transitions, as well as the likely proton-coupling site. These are important results, even if they are confirmatory rather than novel. Perhaps most interesting is the position of the counter K<sup>+</sup> ion and the competition seen with Ca<sup>2+</sup>. Overall, while I see the potential scientific impact of this interesting study, it needs some further controls for supporting their main findings.

Major points.

1. The analysis and calculation of Na<sup>+</sup> binding affinity is assessed by a tryptophan residue, which is located ca. 10 Å from the Na<sup>+</sup> sites. The obvious question is whether the change in tryptophan fluorescence faithfully reports on Na<sup>+</sup> binding. It is important too:

- i) show the raw traces of the tryptophan fluorescence with and without Na<sup>+</sup>.
- ii) the change in Trp fluorescence with a mutant that can no longer bind Na<sup>+</sup>.
- iii) the Trp fluorescence change with L-aspartate after Na<sup>+</sup> addition
- iv) the Trp fluorescence with Na<sup>+</sup> and in the presence of the outward-inhibitor UCPH
- v) mutations that abolish Ca<sup>2+</sup> binding.
- vi) binding affinities for Ca<sup>2+</sup> with and without UCPH since the conclusion is that Ca<sup>2+</sup> binds on the inside.

These experiments will confirm that the Trp is mostly reporting on Na<sup>+</sup> binding and the proposed competition with the Ca<sup>2+</sup> site. The outward-inhibitor is a useful control as they should restrict dynamics also contributing to the fluorescent signal.

2. K<sup>+</sup> binding catalyses the return step of the transport cycle and, as such, binds on the "inside". However, structural studies have been carried out for the "outward" facing crystal structure and K<sup>+</sup> could not be modelled in the inward-facing cryo EM structure. The obvious question is whether the Rb<sup>+</sup> signals reports on the "physiological transported K<sup>+</sup>" site in the trapped "outward" state obtained in the presence of an inhibitor. I think it would be informative to compare the K<sub>d</sub> for K<sup>+</sup> with and without the UCPH inhibitor to verify if the binding affinities are symmetric. If so, this would give support for the current K<sup>+</sup> location in the detergent structure.

#### Minor points

1. The W287 is not thought to contribute to a change in fluorescence as it is located on the scaffold. However, movement of the transport domain could still change its environment and report a change in fluorescence. Indeed it is positioned similar to the F273W mutant used in the bacterial homologue GltPh to monitor Na<sup>+</sup> binding by Trp fluorescence. An appropriate control would be to further mutate this residue to phenylalanine.

2. It was concluded that Na<sup>+</sup> binding was not pH dependent as the apparent K<sub>d</sub> didn't change from pH 6 to 10, but substrate binding was pH dependent, Fig. 2B. However, the pH dependence of substrate binding was measured in the presence of only 0.5 mM NaCl, which is far below the K<sub>d</sub> for sodium at 20 mM. As such, can this conclusion really be made from this data?

3. The conclusion that E373 is the proton coupling site seems to have been embellished a little here, since it's pretty much the only candidate that could fulfil such a role and the previous studies showing this are clear. Indeed no other residues were experimentally tested here. I agree it's important to validate this, but some re-writing seems required to more faithfully represent the current standing in the field, e.g., it would make sense to point out the repositioning of E406 between the apo and bound structures in the EAAT3 cryo-EM structure (Qiu et al, 2021) and in MD simulations (Kortzak et al., 2019).

*Referee #1:*

*The study provides a comprehensive analysis of the ion coupling mechanism of the glutamate transporter, EAAT1. This topic has been studied for many years initially using electrophysiological and site-directed mutagenesis methods, and in more recent years with structural biology and molecular dynamics simulations. During this time a number of conflicting proposals were put forward. This current study has managed to bring all these studies together and provide a detailed analysis of the process that is consistent with many earlier proposals. It is wonderful to see it all come together in a way that ties it all together. We thank Referee #1 for pointing out the in-depth and comprehensive nature of our work.*

*Whilst the majority of the work is clearly presented and very convincing, the one aspect of the work that is superficially addressed is the proposal that  $\text{Ca}^{2+}$  binds to the transporter to presumably modulate the function of the transporter. This is a very novel proposal and needs further clarification. Convincing evidence is provided that  $\text{Ca}^{2+}$  binds to an outward facing conformation of the transporter at the Na3 site and that  $\text{Ca}^{2+}$  is not transported by EAAT1. But, this implies that  $\text{Ca}^{2+}$  is able to influence the function of the transporter.*

*We agree with Referee #1 that the effect of  $\text{Ca}^{2+}$  on glutamate transport has not been characterized to its full extent. This will require probing kinetics, as well as steady-state transport varying intra- and extracellular  $[\text{Ca}^{2+}]$ , respectively, and it is out of the scope of the current manuscript, which already constitutes an in-depth functional and structural characterization of ion-coupled transport.*

*There are a few points that need clarification:*

*1. If  $\text{Ca}^{2+}$  binds to the outward facing conformation of the transporter with a  $K_d$  of 2 mM, then you would expect that  $\text{Ca}^{2+}$  would impact on the function of the transporter under physiological conditions. This idea should be explored in greater depth. I would like to see the impact of a  $\text{Ca}^{2+}$  titration on the rate of uptake of substrate. Presumably, this would be via extracellular  $\text{Ca}^{2+}$ , but it would be worthwhile testing the effect of  $\text{Ca}^{2+}$  in both the intracellular and extracellular solutions.*

*Purified EAAT1<sub>CRYST</sub> in detergent solutions is at equilibrium between outward- and inward-facing states (Canul-Tec et al., Nature 2017), hence the  $\text{Ca}^{2+}$  binding parameters that we determined reflect, in principle, binding to both states. Upon suggestion of Referee #2 (Major point 1), during revision we have performed binding experiments in the presence of UCPH101, an allosteric inhibitor that traps the transporters in outward-facing states. We did not observe significant changes in  $\text{Na}^+$ ,  $\text{Na}^+$ /transmitter, or  $\text{Ca}^{2+}$  binding parameters, respectively, suggesting that ligands bind similarly to outward- and inward-facing states. These results are expected, as the tranD moves across the membrane as nearly rigid-body exposing the same binding sites to opposite sides of the membrane. Moreover, "symmetry" in ligand binding affinity to outward- and inward-facing states has been observed in prokaryotic homolog GltPh (Reyes et al., Nat. Struct. Mol. Biol. 2013). Hence, we conclude that  $\text{Ca}^{2+}$  is able to bind to outward- and inward-facing states, respectively, with apparent  $K_D$  values  $\sim$  2 mM.*

*Regarding  $\text{Ca}^{2+}$  effect on transmitter transport, as stated above, we strongly believe that it deserves a separate study involving time-resolved techniques like patch-clamp electrophysiology. However, to shed some light on this problem, during revision we performed two types of experiments:*

*i) In cells expressing EAAT1<sub>CRYST</sub>, we measured steady-state uptake at saturating (60  $\mu\text{M}$ ) and sub-saturating (20  $\mu\text{M}$ ) glutamate concentrations, respectively, in the presence of 5 mM*

extracellular  $\text{Ca}^{2+}$ , or after substituting  $\text{Ca}^{2+}$  for  $\text{Mg}^{2+}$  (a divalent cation that does not compete with  $\text{Na}^{+}$  or yields Trp fluorescence changes in purified EAAT1CRYST; not shown). Under these conditions, we did not observe significant differences between  $\text{Ca}^{2+}$  and  $\text{Mg}^{2+}$  buffers. These results are somehow expected, as extracellular  $\text{Ca}^{2+}$  binding is too weak to out-compete  $3\text{Na}^{+}/1\text{H}^{+}/1$  transmitter coupled binding. However, our uptake assay is not able to resolve potential  $\text{Ca}^{2+}$  effects on EAAT1 kinetics.

ii) We also compared EAAT1CRYST-mediated uptake in liposomes loaded with  $\text{K}^{+}$  and different  $\text{Ca}^{2+}$  concentrations. Interestingly, we observed an inhibitory effect of  $\text{Ca}^{2+}$  with  $\text{IC}_{50} \sim 5$  mM. This effect could be due to facilitation of transmitter re-binding, as  $\text{Ca}^{2+}$  and transmitter are thermodynamically coupled, supporting the idea that under physiological conditions with cytoplasmic [glutamate] in the mM range,  $\text{Ca}^{2+}$ /transmitter coupled binding could possibly affect transport rate.

In summary, although additional experimental work is needed to determine if  $\text{Ca}^{2+}$  plays modulatory role(s) in EAAT-mediated glutamate transport at the synapse, we think that is important to make the readers aware of this possibility. In the revised manuscript, we have edited the section on “ $\text{Ca}^{2+}$  binding at  $\text{Na}_3$ ” to show and discuss results on  $\text{Ca}^{2+}$  binding in the presence of UCPH101 and to mutant D400<sub>380</sub>N at  $\text{Na}_3$ , respectively (revised Fig. 5B), as well as the effect of  $\text{Ca}^{2+}$  in cells and liposomes (revised Fig. EV5).

*2. Whilst the above experiment may address the issue as to whether the relevant  $\text{Ca}^{2+}$  is intracellular or extracellular, it would be nice to use molecular dynamics simulations to get a better understanding of the entry pathways of  $\text{Ca}^{2+}$  into the  $\text{Na}_3$  site.*

We agree with Referee #1 that MD simulations and other experiments will be important to characterize the role of  $\text{Ca}^{2+}$  on glutamate transport, but they are outside the scope of this work.

*3. In the discussion of the potential role of  $\text{Ca}^{2+}$ , the authors have speculated as to the impact of variations in intracellular  $\text{Ca}^{2+}$ . If  $\text{Ca}^{2+}$  is binding to the outward facing state, then extracellular  $\text{Ca}^{2+}$  is more physiologically relevant. This needs to be clarified.*

We regret the lack of clarity in this regard. EAAT1CRYST  $\text{Ca}^{2+}/\text{Ba}^{2+}$  bound structure is in an outward facing state because of both crystal-contacts and the presence of allosteric inhibitor UCPH101 that stabilizes such states.

As explained above, and in the revised manuscript (Results section:  $\text{Ca}^{2+}$  binding to  $\text{Na}_3$ ), in a cellular context with  $\sim 120$   $\text{Na}^{+}$  outside,  $\text{Ca}^{2+}$  binding is too weak to out-compete  $3\text{Na}^{+}/1\text{H}^{+}/1$  transmitter coupled binding. However, it seems more likely that due to  $\text{Ca}^{2+}$ /transmitter thermodynamic coupling,  $\text{Ca}^{2+}$  could aid cytoplasmic glutamate (at high [glutamate]) to re-bind.

*This additional work on the role of  $\text{Ca}^{2+}$  suggested may be better suited to a separate study, but I am happy to leave this suggestion to the authors*

We appreciate the suggestion by Referee #1 to leave the additional work related to the role of  $\text{Ca}^{2+}$  to a separate study.

*Referee #2:*

*Glutamate is the most abundant excitatory neurotransmitter in the CNS and the glutamate transporters (EAATs 1-5) are important in the re-uptake of glutamate from the synaptic cleft. Central to the mechanism of the EAATs is the coupling between  $\text{Na}^{+}$ ,  $\text{H}^{+}$  and glutamate as well as  $\text{K}^{+}$ , which catalyses the transition back to the outward-state after releasing sodium*

*and substrate. The manuscript by the Reyes lab builds upon their previous crystal structure of EAAT1 with a combination of spectroscopy, crystal structures in complex with anomalous scatters mimicking Na<sup>+</sup>/K<sup>+</sup> sites as well as a mutant deficient in proton coupling, a cryo EM structure of EAAT1, transport assays and HDX-MS measurements. By combining these methods they have been able to validate the location of the three Na<sup>+</sup> sites, the elevator-structural transitions, as well as the likely proton-coupling site. These are important results, even if they are confirmatory rather than novel. Perhaps most interesting is the position of the counter K<sup>+</sup> ion and the competition seen with Ca<sup>2+</sup>. Overall, while I see the potential scientific impact of this interesting study, it needs some further controls for supporting their main findings.*

We thank Referee #2 for highlighting the impact of our work, and for suggesting important controls to strengthen our findings. During revision, we carried out those controls, that include probing ligands binding in the presence of UCPH101, a mutant at Na<sub>3</sub> site that impairs both Na<sup>+</sup> and Ca<sup>2+</sup> binding, as well as Phe mutations of Trp residues. The results are described below and included in the revised manuscript

### *Major points.*

*1. The analysis and calculation of Na<sup>+</sup> binding affinity is assessed by a tryptophan residue, which is located ca. 10 Å from the Na<sup>+</sup> sites. The obvious question is whether the change in tryptophan fluorescence faithfully reports on Na<sup>+</sup> binding. It is important to:*

*i) show the raw traces of the tryptophan fluorescence with and without Na<sup>+</sup>.*

Revised Fig. 1A shows tryptophan-fluorescence changes induced by Na<sup>+</sup> (blue) and K<sup>+</sup> (black), respectively. Na<sup>+</sup> induces robust fluorescence changes that enable titrations and quantification of apparent KD values. In contrast, K<sup>+</sup> induces minor fluorescence changes, precluding such measurements, and showing that Trp-fluorescence reports on Na<sup>+</sup>-binding.

*ii) the change in Trp fluorescence with a mutant that can no longer bind Na<sup>+</sup>.*

Revised Fig. 1B shows that mutation D400<sub>380</sub>N at Na<sub>3</sub> greatly impairs Na binding, further reassuring that fluorescence signals report on Na<sup>+</sup> binding to conserved sites observed in the structure.

*iii) the Trp fluorescence change with L-aspartate after Na<sup>+</sup> addition*

Revised Fig. 1C shows fluorescence changes of Asp titrations in the presence (blue) and absence (black) of Na<sup>+</sup>, respectively. In the former, but not in the latter, we observed significant fluorescence changes, as expected for Na<sup>+</sup>/transmitter coupled binding.

*iv) the Trp fluorescence with Na<sup>+</sup> and in the presence of the outward-inhibitor UCPH*

Revised Fig. 1B and 1D show that saturating concentrations of UCPH<sub>101</sub> inhibitor do not affect significantly Na<sup>+</sup> (red circles) or Asp KD (red circle) values, respectively, suggesting that outward- and inward-facing apo transporters bind Na<sup>+</sup>, and Na<sup>+</sup>/transmitter with similar affinities, as it has been reported in prokaryotic homolog GltPh (Reyes et al., Nat. Struct. Mol. Biol. 2013). These results further indicate that tranD movements associated to membrane translocation do not contribute greatly to steady-state fluorescence signal.

*v) mutations that abolish Ca<sup>2+</sup> binding.*

Revised Fig. 4B shows that mutation D400<sub>380</sub>N at Na<sub>3</sub> greatly impairs Ca<sup>2+</sup> binding, supporting Ca<sup>2+</sup> occupancy of this site, as well as competition with Na<sup>+</sup>.

vi) *binding affinities for Ca<sup>2+</sup> with and without UCPH since the conclusion is that Ca<sup>2+</sup> binds on the inside.*

We regret the lack of clarity regarding Ca<sup>2+</sup> binding sidedness. The following is our response to Referee #1, who also raised concern about this issue:

Purified EAAT1<sub>CRYST</sub> in detergent solutions is at equilibrium between outward- and inward-facing states (Canul-Tec et al., Nature 2017), hence the Ca<sup>2+</sup> binding parameters that we determined reflect, in principle, binding to both states. Upon suggestion of Referee #2 (Major poin 1), during revision we have performed binding experiments in the presence of UCPH101, an allosteric inhibitor that traps the transporters in outward-facing states. We did not observe significant changes in Na<sup>+</sup>, Na<sup>+</sup>/transmitter, or Ca<sup>2+</sup> binding parameters, respectively, suggesting that ligands bind similarly to outward- and inward-facing states. These results are expected, as the tranD moves across the membrane as nearly rigid-body exposing the same binding sites to opposite sides of the membrane. Moreover, “symmetry” in ligand binding affinity to outward- and inward-facing states has been observed in prokaryotic homolog GltPh (Reyes et al., Nat. Struct. Mol. Biol. 2013). Hence, we conclude that Ca<sup>2+</sup> is able to bind to outward- and inward-facing states, respectively, with apparent KD values ~ 2 mM.

Regarding Ca<sup>2+</sup> effect on transmitter transport, as stated above, we strongly believe that it deserves a separate study involving time-resolved techniques like patch-clamp electrophysiology. However, to shed some light on this problem, during revision we performed two types of experiments:

i) In cells expressing EAAT1<sub>CRYST</sub>, we measured steady-state uptake at saturating (60 μM) and sub-saturating (20 μM) glutamate concentrations, respectively, in the presence of 5 mM extracellular Ca<sup>2+</sup>, or after substituting Ca<sup>2+</sup> for Mg<sup>2+</sup> (a divalent cation that does not compete with Na<sup>+</sup> or yields Trp fluorescence changes in purified EAAT1<sub>CRYST</sub>; not shown). Under these conditions, we did not observe significant differences between Ca<sup>2+</sup> and Mg<sup>2+</sup> buffers. These results are somehow expected, as extracellular Ca<sup>2+</sup> binding is too weak to out-compete 3Na<sup>+</sup>/1H<sup>+</sup>/1transmitter coupled binding. However, our uptake assay is not able to resolve potential Ca<sup>2+</sup> effects on EAAT1 kinetics.

ii) We also compared EAAT1<sub>CRYST</sub>-mediated uptake in liposomes loaded with K<sup>+</sup> and different Ca<sup>2+</sup> concentrations. Interestingly, we observed an inhibitory effect of Ca<sup>2+</sup> with IC<sub>50</sub> ~ 5 mM. This effect could be due to facilitation of transmitter re-binding, as Ca<sup>2+</sup> and transmitter are thermodynamically coupled, supporting the idea that under physiological conditions with cytoplasmic [glutamate] in the mM range, Ca<sup>2+</sup>/transmitter coupled binding could possibly affect transport rate.

In summary, although additional experimental work is needed to determine if Ca<sup>2+</sup> plays modulatory role(s) in EAAT-mediated glutamate transport at the synapse, we think that is important to make the readers aware of this possibility. In the revised manuscript, we have edited the section on “Ca<sup>2+</sup> binding at Na<sup>3</sup>” to show and discuss results on Ca<sup>2+</sup> binding in the presence of UCPH101 and to mutant D400<sub>380</sub>N at Na<sup>3</sup>, respectively (revised Fig. 5B), as well as the effect of Ca<sup>2+</sup> in cells and liposomes (revised Fig. EV5).

*These experiments will confirm that the Trp is mostly reporting on Na<sup>+</sup> binding and the proposed competition with the Ca<sup>2+</sup> site. The outward-inhibitor is a useful control as they should restrict dynamics also contributing to the fluorescent signal.*

We thank Referee #2 for suggesting these important controls to confirm that Trp fluorescence signals arise from changes in tranD dynamics upon Na<sup>+</sup> and Ca<sup>2+</sup> binding involving Na<sup>3</sup>, as opposed to tranD rigid-body movements, and that ligands bind outward- and inward-facing states with similar apparent affinities in detergent solutions.



2.  $K^+$  binding catalyses the return step of the transport cycle and, as such, binds on the "inside". However, structural studies have been carried out for the "outward" facing crystal structure and  $K^+$  could not be modelled in the inward-facing cryo EM structure. The obvious question is whether the  $Rb^+$  signals reports on the "physiological transported  $K^+$ " site in the trapped "outward" state obtained in the presence of an inhibitor. I think it would be informative to compare the  $K_d$  for  $K^+$  with and without the UCPH inhibitor to verify if the binding affinities are symmetric. If so, this would give support for the current  $K^+$  location in the detergent structure.

As it occurs with  $Na^+/H^+$ /transmitter binding,  $K^+$  binding to transporters is not a specific feature of outward- or inward-facing states, and to the best of our knowledge, there is no experimental evidence suggesting that  $K^+$  binds different sites from inside and outside, respectively. In contrast,  $K^+$  binding to a single site from either outside or inside is expected because the tranD moves nearly as a rigid-body to opposite sides of the membrane. Under physiological ionic gradients,  $K^+$  binds on the inside simply because cytoplasmic  $[K^+] \gg [Na^+]$ . Indeed, it is well established that when ionic gradients are experimentally inverted, the transport cycle works in reverse mode, and external  $K^+$  binds on the outside and is transported into the cytoplasm. Indeed, early electrophysiological determination of  $K^+$  transport stoichiometry by the Attwell (Nature 1988; this reference has now been added to the manuscript), and Kavanaugh (Nature 1996) labs was done by titrating the effect of external (not cytoplasmic)  $K^+$  on transport. Hence,  $K^+$  binds both outward- and inward-facing states, and the two  $K^+$ -bound states are physiologically relevant.

Regarding  $Rb^+$  binding, we demonstrate in the manuscript that  $Rb^+$  is a functional  $K^+$  analog, as it is counter-transported in liposome uptake assays (revised Fig. 4A). Hence, we don't see strong reasons to believe that  $Rb^+$  interacts differently than  $K^+$  with the transporter. Regretfully, as shown in revised Fig. 1A,  $K^+$  does not yield robust fluorescence changes to enable titrations and  $KD$  determination. We agree with Referee #2 that verifying similar  $K^+$  affinities in the presence and absence of UCPH101 could provide some support to the location of the  $K^+$  binding site observed in the structure. However, differential  $K^+$  affinities under those conditions would not directly argue against a single  $K^+$  site to bind the ion from outside and inside, respectively.

(Additional comment via email exchange with Editor):

Referee #2: Basically the authors are saying that they cannot measure  $K^+$  binding by tryptophan fluorescence, but they can measure  $Na^+$ . Its a little surprising since the location of the proposed  $K^+$  position is close to the  $Na^+$  binding sites from what I can recall. If the other controls for the Trp fluorescence assay that I suggested work out (as expected), this information will provide some further confidence in the assay. Based on this data one can then speculate why  $K^+$  is not able to be detected by the Trp binding assay. Regarding the impact of the paper I think that if they cannot validate the binding mode for  $K^+$  (which is thought to be specific to the inward and not the outward-facing state) then they will need to tone down the  $K^+$  section and/or add a caveat to mention that it possible  $K^+$  may bind differently in the inward-facing conformation.

Indeed,  $Na^+$  (as well as  $Ca^{2+}$  and transmitter), but not  $K^+$ , induce robust Trp-fluorescence changes (revised Fig. 1). Although, we do not understand the structural details underlying Trp-fluorescence changes in EAAT1CRYST, individual Phe mutations of W267 and W473 (suggested by Referee #2, see below Minor point #1) show that both Trp residues are required to probe  $Na^+$  and transmitter binding with this assay, and suggest that Trp fluorescence changes arise from short- and long-range effects. Moreover, binding experiments in the presence and absence of UCPH101 (also suggested by Referee #2) suggest that elevator-like

movements of the tranD do not contribute to Trp fluorescence. As for the lack of fluorescence signal associated to K<sup>+</sup> binding, we can only speculate that tranD dynamics around the two Trp are not very different between Apo and K<sup>+</sup> bound states, as opposed to Apo and Na<sup>+</sup>/transmitter bound states. Consistently, changes in HDX profiles between K<sup>+</sup>-bound and Na<sup>+</sup>/transmitter bound states show differential protein dynamics under the two conditions. In the revised manuscript, we have extensively edited the section on Trp-fluorescence binding assay, and show lack of fluorescence signal associated to K<sup>+</sup>, as well as describe the effect of Phe mutations. However, considering that: K<sup>+</sup> binding is not specific of inward-facing states; tranD tranlocates ligands binding sites as a rigid-body; there is no experimental evidence suggesting that K<sup>+</sup> binds different sites in outward and inward-facing states, respectively; the Rb<sup>+</sup>-bound structure represents the first structural determination of a counter-transported ion binding site; we kindly disagree to “tone-down” the K<sup>+</sup> section or suggest that K<sup>+</sup> may bind differently from the inside.

### Minor points

1. The W287 is not thought to contribute to a change in fluorescence as it is located on the scaffold. However, movement of the transport domain could still change its environment and report a change in fluorescence. Indeed it is positioned similar to the F273W mutant used in the bacterial homologue GltPh to monitor Na<sup>+</sup> binding by Trp fluorescence. An appropriate control would be to further mutate this residue to phenylalanine.

In order to gain insight on the contribution of Trp residues to the fluorescence signal, and as suggested by Referee #2 (Minor point 1, see below), we probed individual Phe mutants. As expected, W473F mutation in the transport domain abolished Na<sup>+</sup> induced fluorescence changes, consistent with W473F being the main fluorescence reporter. Unexpectedly, W267F mutation in the scaffold domain significantly decreased Trp fluorescence changes suggesting that W267 is required to preserve changes in tranD dynamics upon binding, or that it senses binding through long-range conformational changes, or both. In the revised manuscript, we have extensively edited this section, and removed the discussion associated to distances between Trp residues and substrate binding site.

2. It was concluded that Na<sup>+</sup> binding was not pH dependent as the apparent K<sub>d</sub> didn't change from pH 6 to 10, but substrate binding was pH dependent, Fig. 2B. However, the pH dependance of substrate binding was measured in the presence of only 0.5 mM NaCl, which is far below the K<sub>d</sub> for sodium at 20 mM. As such, can this conclusion really be made from this data?

In our view, this conclusion can only be made at low Na<sup>+</sup> concentrations. Both Na<sup>+</sup> and protons lead to formation of substrate-occluded states. Promoting such states with high Na<sup>+</sup> would mask the coupling efficiency of the proton, and vice versa the coupling efficiency of Na<sup>+</sup> is lower at acidic pH. In the absence of substrate, Na<sup>+</sup> K<sub>d</sub> is ~20 mM, but due to their thermodynamic coupling in the presence of transmitter Na<sup>+</sup> K<sub>d</sub> decreases. This has been shown in prokaryotic homologs (Reyes et al., Nat. Struct. Mol. Biol. 2013).

In other words, the thermodynamic coupling efficiency of one ion to the substrate is a function of other coupled ions, and is maximal at lower concentrations of the latter.

*3. The conclusion that E373 is the proton coupling site seems to have been embellished a little here, since its pretty much the only candidate that could fulfil such a role and the previous studies showing this are clear. Indeed no other residues were experimentally tested here. I agree its an important to validate this, but some re-writing seems required to more faithfully represent the current standing in the field, e.g., it would make sense to point out the*

*repositioning of E406 between the apo and bound structures in the EAAT3 cryo-EM structure (Qiu et al, 2021) and in MD simulations (Kortzak et al., 2019).*

We would like to insist that there are other residues that could contribute to proton-coupling in the tranD beyond E406, like Y405. In our work, we discarded other candidates based on a comprehensive alignment of EAAT and ASCT mammalian orthologs (revised Fig EV1), lack of proton effect on Na binding (revised Fig. 3A), as well as mutagenesis (Y405F) (revised Fig. 3C). In addition, we do cite and discuss previous work on proton-coupling, not only related to EAAT3 cryo-EM structure (Qiu et al, 2021) and MD simulations (Heinzelmann and Kuyucak, 2014), but more importantly related to the seminal work by the Grewer laboratory (Grewer et al., JBC 2003) that pointed to equivalent E406 residue as the main proton acceptor in transport (see line 182 in revised manuscript “Our results agree well with early studies of rodent ortholog EAAC1 showing that equivalent mutation to E406<sup>386</sup>Q (E373Q) impairs pH-dependence of apparent glutamate-binding (Grewer et al., 2003), as well as with molecular dynamic simulations of transmitter binding (Heinzelmann and Kuyucak, 2014), and support the role of E406 carboxylate as the main proton acceptor in the transport cycle”).

Regarding repositioning of E406, we have edited the revised manuscript (line 389) to emphasize on previous reports: “The close proximity of conserved R479<sup>459</sup> to K<sub>CT</sub> argues that electrostatic shielding of its sidechain is required for K<sup>+</sup> occlusion and translocation, as suggested by reported apo EAAT3 structure (Qiu et al., 2021) and MD simulations (Kortzak et al., 2019), and hydration of the tranD core is likely key to this process.”

Finally, we would like to highlight that in our work, we present the first measurements of H<sup>+</sup>-coupling efficiency showing that at least ~60% of the H<sup>+</sup> binding energy is coupled to substrate binding, and not to other conformational changes of the transport cycle, and that E406Q mutant disrupts this coupling. We also provide structural explanations on how E406 could contribute to stabilize transmitter occlusion through H-bonding with HP2, as well as how E406 contributes to the K<sup>+</sup> mechanism by shielding K<sub>CT</sub> from neighboring R479. These conclusions could not be resolved in previous reports, among other things because the position of the K<sup>+</sup> binding site was not determined experimentally using structural-biology techniques.

Dear Dr. Reyes,

Thank you for submitting your revised manuscript (EMBOJ-2021-108341R) to The EMBO Journal, as well as your patience with our response. Your amended study was sent back to the reviewers for re-evaluation, and we have received comments from both of them, which I enclose below.

The referees stated that their issues have been comprehensively resolved and they are now broadly in favour of publication, pending minor revision.

Thus, we are pleased to inform you that your manuscript has been accepted in principle for publication in The EMBO Journal.

Please consider the remaining minor issue stated by referee #2 carefully by adjusting the text and data where appropriate. Further, we need you to consider a number of points related to formatting and data deposition as detailed below, which should be addressed at re-submission.

Please contact me at any time if you have additional questions related to below points.

As you might have noted on our web page, every paper at the EMBO Journal now includes a 'Synopsis', displayed on the html and freely accessible to all readers. The synopsis includes a 'model' figure as well as 2-5 one-short-sentence bullet points that summarize the article. I would appreciate if you could provide this figure and the bullet points.

Thank you for giving us the chance to consider your manuscript for The EMBO Journal. I look forward to your final revision.

Again, please contact me at any time if you need any help or have further questions.

Kind regards,

Daniel Klimmeck

Daniel Klimmeck PhD  
Senior Editor  
The EMBO Journal

Formatting changes required for the revised version of the manuscript:

>> Introduce a separate 'Conflict of Interest' section and move it before the references.

>> Release privacy from the PDB/EMD datasets and provide the data processing script as publically accessible information. Add http links on the datasets to the data availability section.

>> Update the bioRxiv citation (Punjabi et al., 2019) as journal publication in the reference list.

Further information is available in our Guide For Authors: <https://www.embopress.org/page/journal/14602075/authorguide>

The revision must be submitted online within 90 days; please click on the link below to submit the revision online before 28th Dec 2021.

<https://emboj.msubmit.net/cgi-bin/main.plex>

-----  
Referee #1:

The revised manuscript is significantly improved and I have no major concerns. Whilst the study of Na<sup>+</sup>/K<sup>+</sup>/H<sup>+</sup> and substrate interactions is very thorough, the main message of the paper will be - that we should also consider Ca<sup>2+</sup>. This will certainly prompt further investigation because at this point it is a tantalising addition to the subject but not fully explored.

Referee #2:

Overall, I think the authors have done a excellent job and addressing the main technical concerns I had in the previous submission. Importantly, the additional controls showing that Trp fluoresce is reporting on Na<sup>+</sup>/transmitter binding, with no response to either K<sup>+</sup> or L-Asp titrations in the absence of Na<sup>+</sup>. I only have one further comment below.

Minor points:

Lines 94 to 98 it is written:

"contains two tryptophan residues, W287 in the scaD, and W473 in the tranD. Individual phenylalanine mutants W287F and W473F decreased ( $\Delta F/F_0 \sim 5\%$ ), and abolished, respectively, Na<sup>+</sup>/transmitter induced fluorescence signal."

However, I couldn't seem to find the data for the W287F and W473F controls in any of the figures? Please include them if they are not there.

*Referee #1:*

*The revised manuscript is significantly improved and I have no major concerns. Whilst the study of Na<sup>+</sup>/K<sup>+</sup>/H<sup>+</sup> and substrate interactions is very thorough, the main message of the paper will be - that we should also consider Ca<sup>2+</sup>. This will certainly prompt further investigation because at this point it is a tantalising addition to the subject but not fully explored.*

We agree with Referee #1, and as mention in the revised manuscript, understanding the role of extra and/or intracellular Ca<sup>2+</sup> in transmitter transport requires further experimentation.

*Referee #2:*

*Overall, I think the authors have done a excellent job and addressing the main technical concerns I had in the previous submission. Importantly, the additional controls showing that Trp fluoresce is reporting on Na<sup>+</sup>/transmitter binding, with no response to either K<sup>+</sup> or L-Asp titrations in the absence of Na<sup>+</sup>. I only have one further comment below.*

*Minor points:*

*Lines 94 to 98 it is written:*

*"contains two tryptophan residues, W287 in the scaD, and W473 in the tranD. Individual phenylalanine mutants W287F and W473F decreased (delta F/F0 ~5%), and abolished, respectively, Na<sup>+</sup>/transmitter induced fluorescence signal."*

*However, I couldn't seem to find the data for the W287F and W473F controls in any of the figures? Please include them if they are not there.*

The results of Trp to Phe mutations are now included in Supp. Fig. 1.

Dear Dr Reyes,

Thank you for submitting the revised version of your manuscript. I have now evaluated your amended manuscript and concluded that the remaining minor concerns have been sufficiently addressed.

Thus, I am pleased to inform you that your manuscript has been accepted for publication in the EMBO Journal.

Please note that it is EMBO Journal policy for the transcript of the editorial process (containing referee reports and your response letter) to be published as an online supplement to each paper.

Also, in case you might NOT want the transparent process file published at all, you will also need to inform us via email immediately. More information is available here: [http://emboj.emboress.org/about#Transparent\\_Process](http://emboj.emboress.org/about#Transparent_Process)

-----  
Please note that in order to be able to start the production process, our publisher will need and contact you regarding the following forms:

- PAGE CHARGE AUTHORISATION (For Articles and Resources)  
[http://onlinelibrary.wiley.com/journal/10.1002/\(ISSN\)1460-2075/homepage/tej\\_apc.pdf](http://onlinelibrary.wiley.com/journal/10.1002/(ISSN)1460-2075/homepage/tej_apc.pdf)

- LICENCE TO PUBLISH (for non-Open Access)

Your article cannot be published until the publisher has received the appropriate signed license agreement. Once your article has been received by Wiley for production you will receive an email from Wiley's Author Services system, which will ask you to log in and will present them with the appropriate license for completion.

- LICENCE TO PUBLISH for OPEN ACCESS papers

Authors of accepted peer-reviewed original research articles may choose to pay a fee in order for their published article to be made freely accessible to all online immediately upon publication. The EMBO Open fee is fixed at \$5,200 (+ VAT where applicable).

We offer two licenses for Open Access papers, CC-BY and CC-BY-NC-ND.  
For more information on these licenses, please visit: <http://creativecommons.org/licenses/by/3.0/> and [http://creativecommons.org/licenses/by-nc-nd/3.0/deed.en\\_US](http://creativecommons.org/licenses/by-nc-nd/3.0/deed.en_US)

- PAYMENT FOR OPEN ACCESS papers

You also need to complete our payment system for Open Access articles. Please follow this link and select EMBO Journal from the drop-down list and then complete the payment process: [https://authorservices.wiley.com/bauthor/onlineopen\\_order.asp](https://authorservices.wiley.com/bauthor/onlineopen_order.asp)

Should you be planning a Press Release on your article, please get in contact with [embojournal@wiley.com](mailto:embojournal@wiley.com) as early as possible, in order to coordinate publication and release dates.

On a different note, I would like to alert you that EMBO Press is currently developing a new format for a video-synopsis of work published with us, which essentially is a short, author-generated film explaining the core findings in hand drawings, and, as we believe, can be very useful to increase visibility of the work. This has proven to offer a nice opportunity for exposure i.p. for the first author(s) of the study. Please see the following link for representative examples and their integration into the article web page:

[https://www.embopress.org/video\\_synopses](https://www.embopress.org/video_synopses)  
<https://www.embopress.org/doi/full/10.15252/emj.2019103932>

Please let me know, should you be interested to engage in commissioning a similar video synopsis for your work. According operation instructions are available and intuitive.

If you have any questions, please do not hesitate to call or email the Editorial Office.

Thank you again for this contribution to The EMBO Journal and congratulations on a successful publication! Please consider us again in the future for your most exciting work.

Kind regards,

Daniel Klimmeck

Daniel Klimmeck, PhD  
Senior Editor  
The EMBO Journal  
EMBO  
Postfach 1022-40  
Meyerhofstrasse 1  
D-69117 Heidelberg  
contact@embojournal.org  
Submit at: <http://emboj.msubmit.net>

\*\* Click here to be directed to your login page: <https://emboj.msubmit.net>



YOU MUST COMPLETE ALL CELLS WITH A PINK BACKGROUND ↓

PLEASE NOTE THAT THIS CHECKLIST WILL BE PUBLISHED ALONGSIDE YOUR PAPER

Corresponding Author Name: Nicolas Reyes

Journal Submitted to: EMBO Journal

Manuscript Number: EMBOJ-2021-108341

**Reporting Checklist For Life Sciences Articles (Rev. June 2017)**

This checklist is used to ensure good reporting standards and to improve the reproducibility of published results. These guidelines are consistent with the Principles and Guidelines for Reporting Preclinical Research issued by the NIH in 2014. Please follow the journal's authorship guidelines in preparing your manuscript.

**A- Figures****1. Data****The data shown in figures should satisfy the following conditions:**

- the data were obtained and processed according to the field's best practice and are presented to reflect the results of the experiments in an accurate and unbiased manner.
- figure panels include only data points, measurements or observations that can be compared to each other in a scientifically meaningful way.
- graphs include clearly labeled error bars for independent experiments and sample sizes. Unless justified, error bars should not be shown for technical replicates.
- if  $n < 5$ , the individual data points from each experiment should be plotted and any statistical test employed should be justified
- Source Data should be included to report the data underlying graphs. Please follow the guidelines set out in the author ship guidelines on Data Presentation.

**2. Captions****Each figure caption should contain the following information, for each panel where they are relevant:**

- a specification of the experimental system investigated (eg cell line, species name).
- the assay(s) and method(s) used to carry out the reported observations and measurements
- an explicit mention of the biological and chemical entity(ies) that are being measured.
- an explicit mention of the biological and chemical entity(ies) that are altered/varied/perturbed in a controlled manner.
- the exact sample size (n) for each experimental group/condition, given as a number, not a range;
- a description of the sample collection allowing the reader to understand whether the samples represent technical or biological replicates (including how many animals, litters, cultures, etc.).
- a statement of how many times the experiment shown was independently replicated in the laboratory.
- definitions of statistical methods and measures:
  - common tests, such as t-test (please specify whether paired vs. unpaired), simple  $\chi^2$  tests, Wilcoxon and Mann-Whitney tests, can be unambiguously identified by name only, but more complex techniques should be described in the methods section;
  - are tests one-sided or two-sided?
  - are there adjustments for multiple comparisons?
  - exact statistical test results, e.g., P values = x but not P values < x;
  - definition of 'center values' as median or average;
  - definition of error bars as s.d. or s.e.m.

Any descriptions too long for the figure legend should be included in the methods section and/or with the source data.

In the pink boxes below, please ensure that the answers to the following questions are reported in the manuscript itself. Every question should be answered. If the question is not relevant to your research, please write NA (non applicable). We encourage you to include a specific subsection in the methods section for statistics, reagents, animal models and human subjects.

**B- Statistics and general methods**

Please fill out these boxes ↓ (Do not worry if you cannot see all your text once you press return)

|                                                                                                                                                                                         |    |
|-----------------------------------------------------------------------------------------------------------------------------------------------------------------------------------------|----|
| 1.a. How was the sample size chosen to ensure adequate power to detect a pre-specified effect size?                                                                                     | NA |
| 1.b. For animal studies, include a statement about sample size estimate even if no statistical methods were used.                                                                       | NA |
| 2. Describe inclusion/exclusion criteria if samples or animals were excluded from the analysis. Were the criteria pre-established?                                                      | NA |
| 3. Were any steps taken to minimize the effects of subjective bias when allocating animals/samples to treatment (e.g. randomization procedure)? If yes, please describe.                | NA |
| For animal studies, include a statement about randomization even if no randomization was used.                                                                                          | NA |
| 4.a. Were any steps taken to minimize the effects of subjective bias during group allocation or/and when assessing results (e.g. blinding of the investigator)? If yes please describe. | NA |
| 4.b. For animal studies, include a statement about blinding even if no blinding was done                                                                                                | NA |
| 5. For every figure, are statistical tests justified as appropriate?                                                                                                                    | NA |
| Do the data meet the assumptions of the tests (e.g., normal distribution)? Describe any methods used to assess it.                                                                      | NA |

**USEFUL LINKS FOR COMPLETING THIS FORM**<http://www.antibodypedia.com><http://1degreebio.org><http://www.equator-network.org/reporting-guidelines/improving-bioscience-research-repo><http://grants.nih.gov/grants/olaw/olaw.htm><http://www.mrc.ac.uk/Ourresearch/Ethicsresearchguidance/Useofanimals/index.htm><http://ClinicalTrials.gov><http://www.consort-statement.org><http://www.consort-statement.org/checklists/view/32-consort/66-title><http://www.equator-network.org/reporting-guidelines/reporting-recommendations-for-tur><http://datadryad.org><http://figshare.com><http://www.ncbi.nlm.nih.gov/gap><http://www.ebi.ac.uk/ega><http://biomodels.net/><http://biomodels.net/miriam/><http://ijb.biochem.sun.ac.za>[http://oba.od.nih.gov/biosecurity/biosecurity\\_documents.html](http://oba.od.nih.gov/biosecurity/biosecurity_documents.html)<http://www.selectagents.gov/>

|                                                                                   |    |
|-----------------------------------------------------------------------------------|----|
| Is there an estimate of variation within each group of data?                      | NA |
| Is the variance similar between the groups that are being statistically compared? | NA |

#### C- Reagents

|                                                                                                                                                                                                                                                                                                                              |                                                          |
|------------------------------------------------------------------------------------------------------------------------------------------------------------------------------------------------------------------------------------------------------------------------------------------------------------------------------|----------------------------------------------------------|
| 6. To show that antibodies were profiled for use in the system under study (assay and species), provide a citation, catalog number and/or clone number, supplementary information or reference to an antibody validation profile. e.g., Antibodypedia (see link list at top right), IDegreeBio (see link list at top right). | NA                                                       |
| 7. Identify the source of cell lines and report if they were recently authenticated (e.g., by STR profiling) and tested for mycoplasma contamination.                                                                                                                                                                        | HEK293 cell line was purchased from ATCC Cat# CRL-1573.3 |

\* for all hyperlinks, please see the table at the top right of the document

#### D- Animal Models

|                                                                                                                                                                                                                                                                                                                                                                                    |    |
|------------------------------------------------------------------------------------------------------------------------------------------------------------------------------------------------------------------------------------------------------------------------------------------------------------------------------------------------------------------------------------|----|
| 8. Report species, strain, gender, age of animals and genetic modification status where applicable. Please detail housing and husbandry conditions and the source of animals.                                                                                                                                                                                                      | NA |
| 9. For experiments involving live vertebrates, include a statement of compliance with ethical regulations and identify the committee(s) approving the experiments.                                                                                                                                                                                                                 | NA |
| 10. We recommend consulting the ARRIVE guidelines (see link list at top right) (PLoS Biol. 8(6), e1000412, 2010) to ensure that other relevant aspects of animal studies are adequately reported. See author guidelines, under 'Reporting Guidelines'. See also: NIH (see link list at top right) and MRC (see link list at top right) recommendations. Please confirm compliance. | NA |

#### E- Human Subjects

|                                                                                                                                                                                                                                                                                                                    |    |
|--------------------------------------------------------------------------------------------------------------------------------------------------------------------------------------------------------------------------------------------------------------------------------------------------------------------|----|
| 11. Identify the committee(s) approving the study protocol.                                                                                                                                                                                                                                                        | NA |
| 12. Include a statement confirming that informed consent was obtained from all subjects and that the experiments conformed to the principles set out in the WMA Declaration of Helsinki and the Department of Health and Human Services Belmont Report.                                                            | NA |
| 13. For publication of patient photos, include a statement confirming that consent to publish was obtained.                                                                                                                                                                                                        | NA |
| 14. Report any restrictions on the availability (and/or on the use) of human data or samples.                                                                                                                                                                                                                      | NA |
| 15. Report the clinical trial registration number (at ClinicalTrials.gov or equivalent), where applicable.                                                                                                                                                                                                         | NA |
| 16. For phase II and III randomized controlled trials, please refer to the CONSORT flow diagram (see link list at top right) and submit the CONSORT checklist (see link list at top right) with your submission. See author guidelines, under 'Reporting Guidelines'. Please confirm you have submitted this list. | NA |
| 17. For tumor marker prognostic studies, we recommend that you follow the REMARK reporting guidelines (see link list at top right). See author guidelines, under 'Reporting Guidelines'. Please confirm you have followed these guidelines.                                                                        | NA |

#### F- Data Accessibility

|                                                                                                                                                                                                                                                                                                                                                                                                                                                                                                                                                                                                                                                                                                 |                                                                                               |
|-------------------------------------------------------------------------------------------------------------------------------------------------------------------------------------------------------------------------------------------------------------------------------------------------------------------------------------------------------------------------------------------------------------------------------------------------------------------------------------------------------------------------------------------------------------------------------------------------------------------------------------------------------------------------------------------------|-----------------------------------------------------------------------------------------------|
| 18. Provide a "Data Availability" section at the end of the Materials & Methods, listing the accession codes for data generated in this study and deposited in a public database (e.g. RNA-Seq data: Gene Expression Omnibus GSE39462, Proteomics data: PRIDE PXD000208 etc.) Please refer to our author guidelines for 'Data Deposition'.<br><br>Data deposition in a public repository is mandatory for:<br>a. Protein, DNA and RNA sequences<br>b. Macromolecular structures<br>c. Crystallographic data for small molecules<br>d. Functional genomics data<br>e. Proteomics and molecular interactions                                                                                      | "Data availability" sections is included in the manuscript                                    |
| 19. Deposition is strongly recommended for any datasets that are central and integral to the study; please consider the journal's data policy. If no structured public repository exists for a given data type, we encourage the provision of datasets in the manuscript as a Supplementary Document (see author guidelines under 'Expanded View' or in unstructured repositories such as Dryad (see link list at top right) or Figshare (see link list at top right)).                                                                                                                                                                                                                         | Atomic models, structure factors, and cryo-EM maps have been deposited in public repositories |
| 20. Access to human clinical and genomic datasets should be provided with as few restrictions as possible while respecting ethical obligations to the patients and relevant medical and legal issues. If practically possible and compatible with the individual consent agreement used in the study, such data should be deposited in one of the major public access-controlled repositories such as dbGAP (see link list at top right) or EGA (see link list at top right).                                                                                                                                                                                                                   | NA                                                                                            |
| 21. Computational models that are central and integral to a study should be shared without restrictions and provided in a machine-readable form. The relevant accession numbers or links should be provided. When possible, standardized format (SBML, CellML) should be used instead of scripts (e.g. MATLAB). Authors are strongly encouraged to follow the MIRIAM guidelines (see link list at top right) and deposit their model in a public database such as Biomedex (see link list at top right) or JWS Online (see link list at top right). If computer source code is provided with the paper, it should be deposited in a public repository or included in supplementary information. | NA                                                                                            |

#### G- Dual use research of concern

|                                                                                                                                                                                                                                                                                               |    |
|-----------------------------------------------------------------------------------------------------------------------------------------------------------------------------------------------------------------------------------------------------------------------------------------------|----|
| 22. Could your study fall under dual use research restrictions? Please check biosecurity documents (see link list at top right) and list of select agents and toxins (APHIS/CDC) (see link list at top right). According to our biosecurity guidelines, provide a statement only if it could. | No |
|-----------------------------------------------------------------------------------------------------------------------------------------------------------------------------------------------------------------------------------------------------------------------------------------------|----|
